# Supplementary material for: Multi-omics analysis reveals COVID-19 vaccine induced attenuation of inflammatory responses during breakthrough disease
Source: PubMed Central journal article supplement (PMC11035709; doi:10.1038/s41467-024-47463-6), 2024-04-22
Supplement: 41467_2024_47463_MOESM1_ESM.pdf [file 41467_2024_47463_MOESM1_ESM.pdf]

# 1 Supplementary

## 3 Supplementary Methods

### 4 Assignment of multi-mapping reads in the small RNA sequencing data.

5 Multi-mapping features are common in small RNA sequencing due to the shortness of the  
6 sequences, embedding of miRNA within the introns of mRNAs and non-coding RNAs and the  
7 frequent duplication of non-coding RNAs in the genome. To deal with multi-mapping reads, a  
8 gene\_union approach was used. In this approach, a multi-mapping sequence is assigned to a  
9 newly created feature whose name is a concatenation of all the genes it maps to. Sequences  
10 which map to the same features will be collapsed to the same newly created feature. The  
11 advantage of this is that all potential loci are represented in the gene expression table,  
12 redundancy is minimised (because reads only contribute to one feature in the gene expression  
13 table), and feature names retain information on mapping certainty, so if feature A\_B is  
14 differentially expressed, it is clear that this sequence could have arisen from either or both  
15 genes.

16  
17 Reads were assigned to the non-coding RNA. The bowtie indexes for the non-coding RNAome  
18 were built by merging fasta files from the following databases: miRbase (miRNAs), SnOPY  
19 (snoRNAs), trRNA\_db (tRNAs), RefSeq (snRNAs, yRNAs, vault RNAs, lncRNAs)<sup>1-3</sup>. piRNA  
20 annotations are not included because there are no high-quality piRNA repositories – most  
21 repositories contain sequences whose mapping is ambiguous (i.e. many map to other non-  
22 coding RNAs). mRNA transcript sequences were downloaded from GENCODE.

### 24 miRNA enrichment analyses

#### 26 Integrating lists of miRNAs and mRNAs

##### 27 miRNA set enrichment analysis:

28 miRNA set enrichment analysis asks whether a single mRNA is targeted by miRNAs that are  
29 generally up or down-regulated, i.e. miRNAs that appear towards the top or bottom of a ranked  
30 list of miRNA (in this study, a differential miRNA expression list ranked by their t-statistic from  
31 most upregulated to most downregulated). Negative enrichment means that miRNAs towards  
32 the bottom of that miRNA-ranked list target the mRNA. Positive enrichment means miRNAs  
33 towards the top of that miRNA-ranked list target the mRNA.

34  
35 In this study, positive enrichment predicts that the expression of the mRNA (or its protein)  
36 would decrease due to more targeting by miRNAs. Conversely, negative enrichment would  
37 suggest that the expression of the mRNA (or its protein) would increase due to less targeting by  
38 miRNAs. The MIEAA 2.0 web server was used to implement this strategy<sup>4</sup>.

### 39 miRNA target enrichment analysis

40 miRNA target enrichment analysis asks whether the mRNA targets of a miRNA are generally up  
41 or down-regulated, i.e. whether they appear towards the top or bottom of a ranked list of miRNA  
42 (in this study, the differential mRNA expression list was ranked by their t-statistic from most  
43 upregulated to most downregulated).

44  
45 Positive enrichment means a miRNA targets mRNAs towards the top of that ranked list.

46 Conversely, negative enrichment means a miRNA targets mRNAs towards the bottom of that  
47 ranked list.

48 If there is a relationship between mRNAs and miRNAs in a system, upregulated miRNAs should  
49 have targets which are negatively enriched because those targets are subject to increased  
50 repression. Conversely, downregulated miRNAs should have targets which are positively  
51 enriched because those targets are released from repression. This strategy is implemented in R  
52 using miRNA target interactions downloaded from miRnet, and the fsgea package, which  
53 implements a GSEA-style enrichment analysis<sup>5,6</sup>.

54

### 55 miRNA pathway analysis

56

#### 57 MIEAA2 GSEA style analysis

58 This approach asks whether all the miRNAs that target all the mRNAs in a pathway are generally  
59 up or downregulated. Positive enrichment means that the pathway contains mRNAs targeted by  
60 miRNAs that are mainly towards the top of the miRNA differential expression list (ranked by t-  
61 statistic from most upregulated to most downregulated). Negative enrichment means that the  
62 pathway contains mRNAs targeted by miRNAs towards the bottom of that ranked list. Positive  
63 enrichment predicts that the expression of mRNAs/proteins in that pathway would decrease  
64 due to more targeting by miRNAs. Conversely, negative enrichment predicts that the expression  
65 of mRNAs/proteins in that pathway increases due to less targeting by miRNAs. MiRNA pathway  
66 analysis was done using the MIEAA2 web server<sup>4</sup>.

67

68 A different way of performing miRNA pathway enrichment analysis is to convert a miRNA(s) to  
69 the genes they target and perform a pathway over-representation analysis. Although this  
70 approach is common in the literature, it generates less useful terms, and cell-cycle and cancer  
71 terms are often over-represented regardless of the list of inputted miRNAs<sup>7</sup>. In addition, a  
72 GSEA-style analysis cannot be done. For this reason, MIEAA2 was used for miRNA pathway-  
73 enriched analyses.

74

75

76

77

78

79

80

81

82

83 Supplementary Results

84

85 Supplementary Figures

86

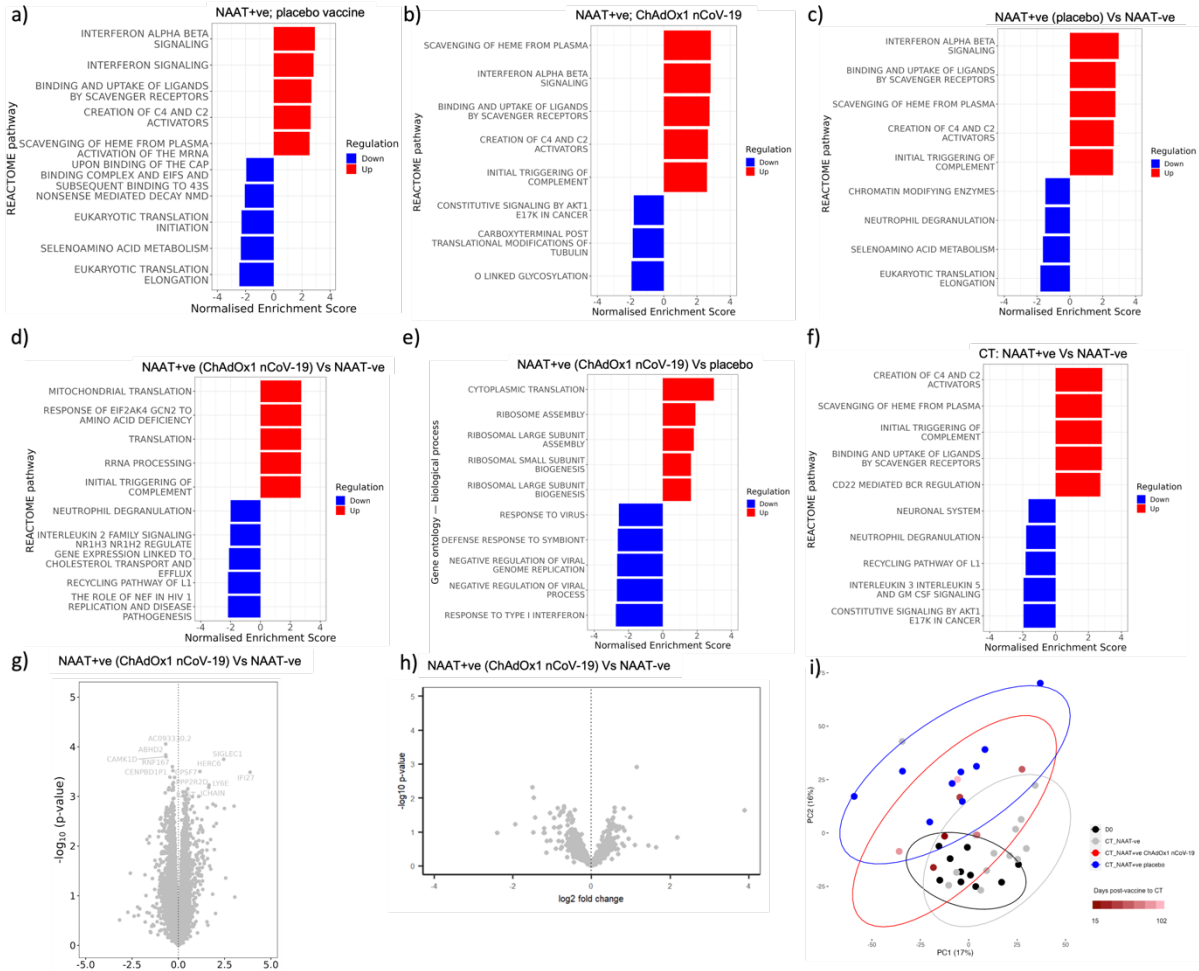

87

88 Supplementary figure 1: Comparing COVID-19 with health and COVID-like illness at gene and pathway levels. a)

89 Gene set enrichment analysis of symptomatic (GSEA) — REACTOME— NAAT+ve individuals from the placebo

90 vaccine arm (n=9). b) GSEA — REACTOME NAAT+ve individuals from the ChAdOx1 nCoV-19 vaccine arm (n=7). c)

91 GSEA — REACTOME — NAAT+ve (placebo vaccine, n=9) compared with symptomatic NAAT-ve individuals (n=13). d)

92 GSEA — REACTOME — NAAT+ve (ChAdOx1 nCoV-19 vaccine, n=9) compared with symptomatic NAAT-ve individuals

93 (n=13). e) Gene set enrichment analysis (GSEA) gene ontology biological process ChAdOx1 nCoV-19 versus placebo

94 vaccine NAAT+ve individuals. f) GSEA —REACTOME— NAAT+ve (both vaccine groups, n=16) vs NAAT-ve individuals

95 (n=13). g) Volcano plot comparing the next-gen RNA-seq blood transcriptome of NAAT+ve (ChAdOx1 nCoV-19

96 vaccine, n=7) and NAAT-ve individuals (n=13) at CT. Differential expression analysis was performed using a two-

97 sided moderate t-test. h) Volcano plot comparing the small RNA-seq blood transcriptome of NAAT+ve (ChAdOx1

98 nCoV-19 vaccine n=7) and symptomatic NAAT-ve individuals at CT (n=13). Differential expression analysis was

99 performed using a two-sided moderate t-test. i) Principal component analysis of blood RNA-seq transcriptome (next-

100 gen RNA-seq) of study participants during symptomatic episodes consistent with COVID-19, with 95% confidence

101 intervals ellipses, stage 1 data. D0 n=10, CT NAAT-ve n=13, CT NAAT+ve ChAdOx1 nCoV-19 n=7, CT NAAT+ve

102 placebo n=9. Time from the last ChAdOx1 nCoV-19 vaccination until CT in NAAT+ve group is shown by the colour

103 gradient.

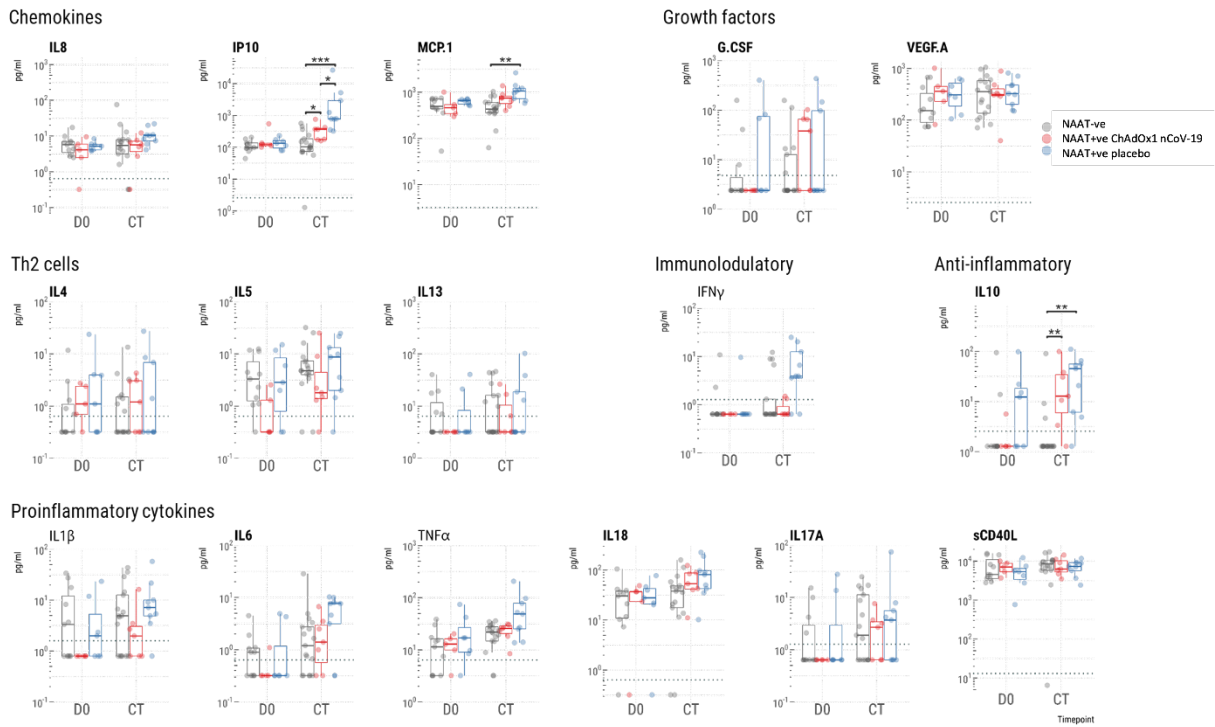

105  
 106  
 107  
 108  
 109  
 110  
 111  
 112  
 113  
 114

Supplementary figure 2: Serum concentrations of 16 detectable cytokines (Chemokines IL8, IP10 and MCP1, growth factors G.CSF and VEGF.A, type 2 cytokines IL4, IL5 and IL13, immunomodulatory IFN $\gamma$ , anti-inflammatory cytokine IL10 and pro-inflammatory cytokines IL1 $\beta$ , IL6, TNF $\alpha$ , IL18, IL17A and sCD40L) measured by Luminex on Stage 1 before vaccinations (D0) and around symptom onset (CT) in NAAT-ve (grey, D0 n=11, CT n=17), NAAT+ve receiving ChAdOx1 nCoV-19 vaccine (red, D0 n=5, CT n=7) and NAAT+ve who received the placebo vaccine (blue, D0 n=7, CT n=9). Each dot represents a volunteer, displayed with medians and IQRs. The dotted line indicates the limit of detection, and values below the limit of detection were assigned a value of half the limit of detection. Statistical comparisons were applied among the 3 groups at each time point by two-sided unpaired Wilcoxon test with FDR test for adjusting, shown as \*FDR < 0.05, \*\*FDR < 0.01, \*\*\*FDR < 0.001.

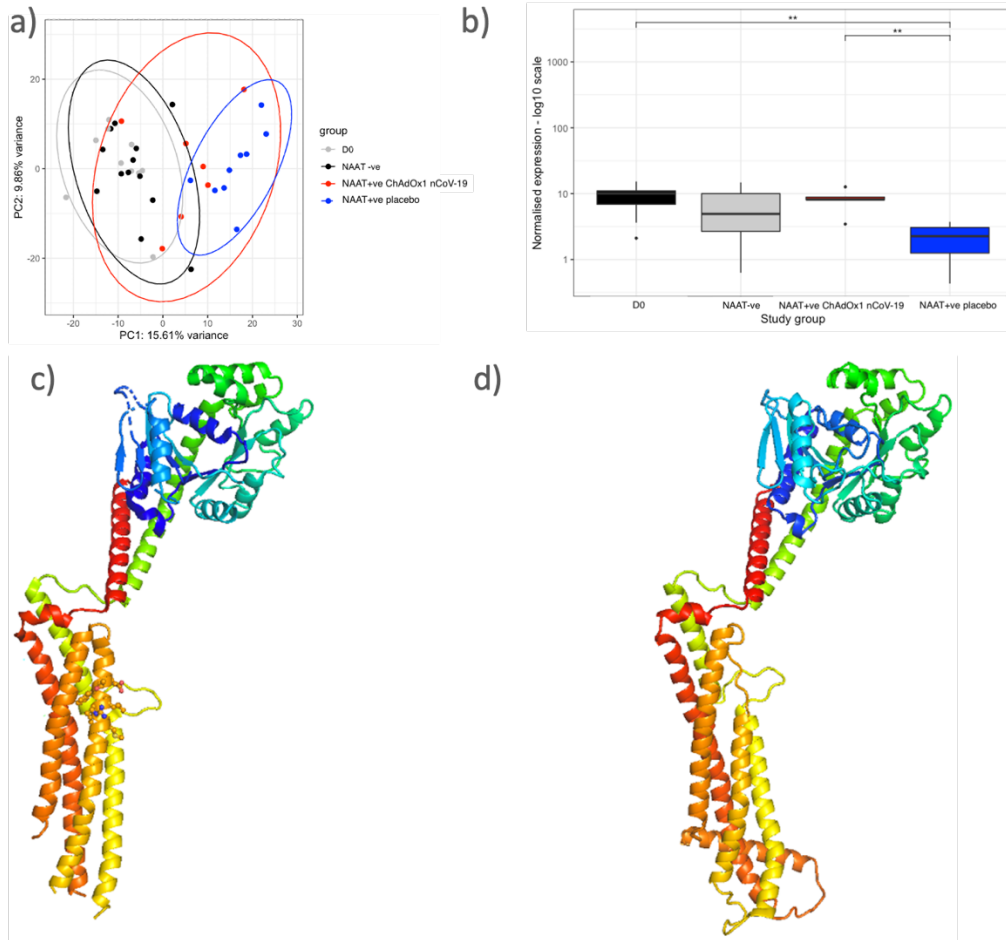

115  
 116  
 117  
 118  
 119  
 120  
 121  
 122  
 123  
 124  
 Supplementary figure 3: Comparing COVID-19 with health and non-covid-like illness in the long-read sequencing data. a) Principal component analysis of long-read 3<sup>rd</sup> gen ONT RNA-seq blood transcriptome of study participants during symptomatic episode consistent with COVID-19, with 95% confidence intervals ellipses. D0 n=10, CT NAAT-ve n=13, CT NAAT+ve ChAdOx1 nCoV-19 n=7, CT NAAT+ve placebo n=9. b) CHCHD5 ENST00000409719 transcript (CHCHD5-202 isoform) expression across the study groups. Statistics: unpaired Wilcoxon test; only significant Bonferroni p-adjusted values are shown (D0 vs NAAT+ve MenACWY p.adj=0.003774, NAAT+ve ChAdOx1 vs NAAT+ve MenACWY p.adj=0.006). c) and d) MX1 protein structure: c) Crystal structure of canonical, wild type 662 aa MX1 protein<sup>8</sup>. Side chains of Met479-VRLAFT-Asp486 are shown as sticks and spheres; d) AlphaFold-derived model of the predicted structure of the truncated 654 aa protein isoform<sup>9</sup>.

125  
 126  
 127

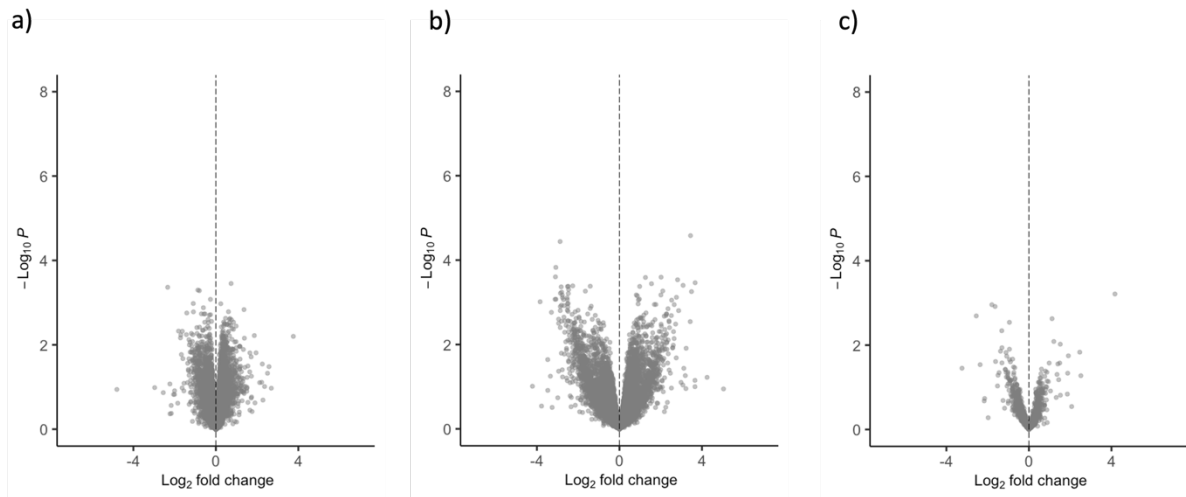

128

129 Supplementary figure 4: Confirmation that vaccination makes no difference in COVID-like illness. a) Volcano plot  
 130 comparing the next-gen RNA-seq blood transcriptome of NAAT-ve ChAdOx1 nCoV-19 vaccinees (n=5) and NAAT-  
 131 ve Placebo individuals (n=8) at CT. b) Volcano plot comparing the 3rd gen RNA-seq blood transcriptome of NAAT-  
 132 ve ChAdOx1 nCoV-19 vaccinees (n=5) and NAAT-ve Placebo individuals (n=8) at CT. c) Volcano plot comparing the  
 133 small RNA-seq blood transcriptome of NAAT-ve ChAdOx1 nCoV-19 vaccinees (n=5) and NAAT-ve Placebo  
 134 individuals (n=8) at CT. Differential expression analysis was performed using a two-sided moderate t-test. Source data provided  
 135 in source data file.

136

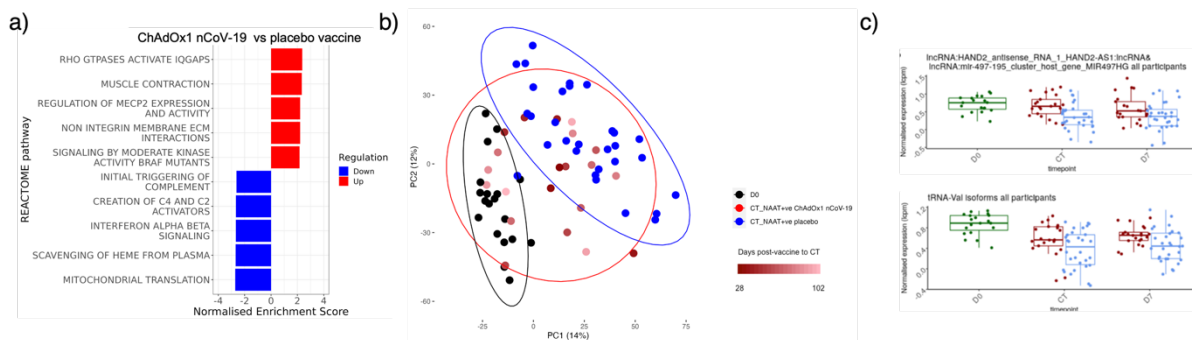

137

138 Supplementary figure 5: Differences between ChAdOx1 nCoV-19 and placebo vaccinees at COVID-19 in the Stage 2  
 139 data. a) Gene set enrichment analysis (GSEA) REACTOME pathway ChAdOx1 nCoV-19 versus placebo vaccine  
 140 NAAT+ve individuals. CT NAAT+ve ChAdOx1 nCoV-19 n=21, CT NAAT+ve placebo n=30. b) Principal component  
 141 analysis of blood RNA-seq transcriptome (next-gen RNA-seq) of study participants during symptomatic episodes  
 142 consistent with COVID-19, with 95% confidence intervals of data points shown in ellipses, stage 2 data. D0 n=19, CT  
 143 NAAT+ve ChAdOx1 nCoV-19 n=21, CT NAAT+ve placebo n=30. Time from the last ChAdOx1 nCoV-19 vaccination  
 144 until CT in NAAT+ve group is shown by the colour gradient. c) Dot plots showing sRNA feature expression across time  
 145 points separated by vaccine group. The whiskers mark the Q1 – 1.5\*IQR and Q3 + 1.5\*IQR. D0 n=19, CT NAAT+ve  
 146 ChAdOx1 nCoV-19 n=21, CT NAAT+ve placebo n=30, CT+7 NAAT+ve ChAdOx1 nCoV-19 n=21, CT+7 NAAT+ve  
 147 placebo n=31. Differential expression analysis was performed using a two-sided moderate t-test.

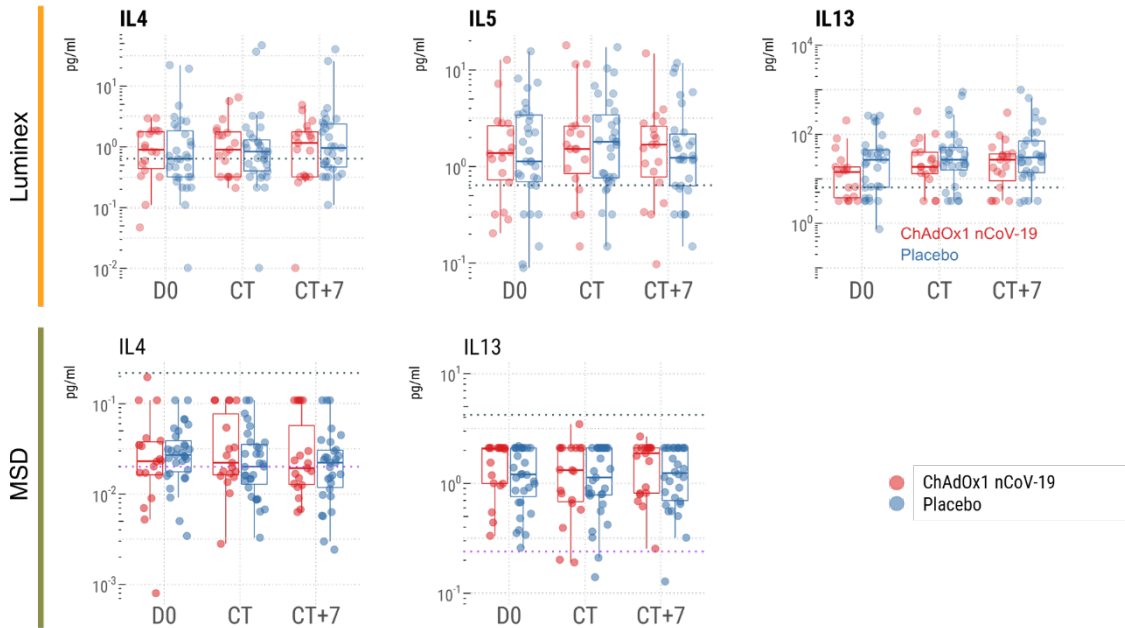

148  
 149 Supplementary figure 6: Th2 cytokines measured prior to and during COVID-19 episode on Luminex and MSD. Each  
 150 dot represents a volunteer, displayed with medians and IQRs. The limit of detection is indicated by a dotted line on  
 151 Luminex graphs (top row), and values below the limit of detection were assigned a value of half the limit of detection.  
 152 The black dotted line indicates the Lower limit of Quantification, and the purple dotted line indicates the Lower limit  
 153 of Detection on MSD graphs (bottom row). Statistical comparisons were applied among the 2 groups (ChAdOx1  
 154 nCoV-19 vaccinees – red and placebo – blue) at each time point by unpaired two-sided Wilcoxon test with FDR test  
 155 adjustment. D0 ChAdOx1 nCoV-19 n=18, D0 placebo n=31, CT ChAdOx1 nCoV-19 n=19, CT placebo n=31, CT+7  
 156 ChAdOx1 nCoV-19 n=19, CT+7 placebo n=30.

157  
 158  
 159  
 160  
 161

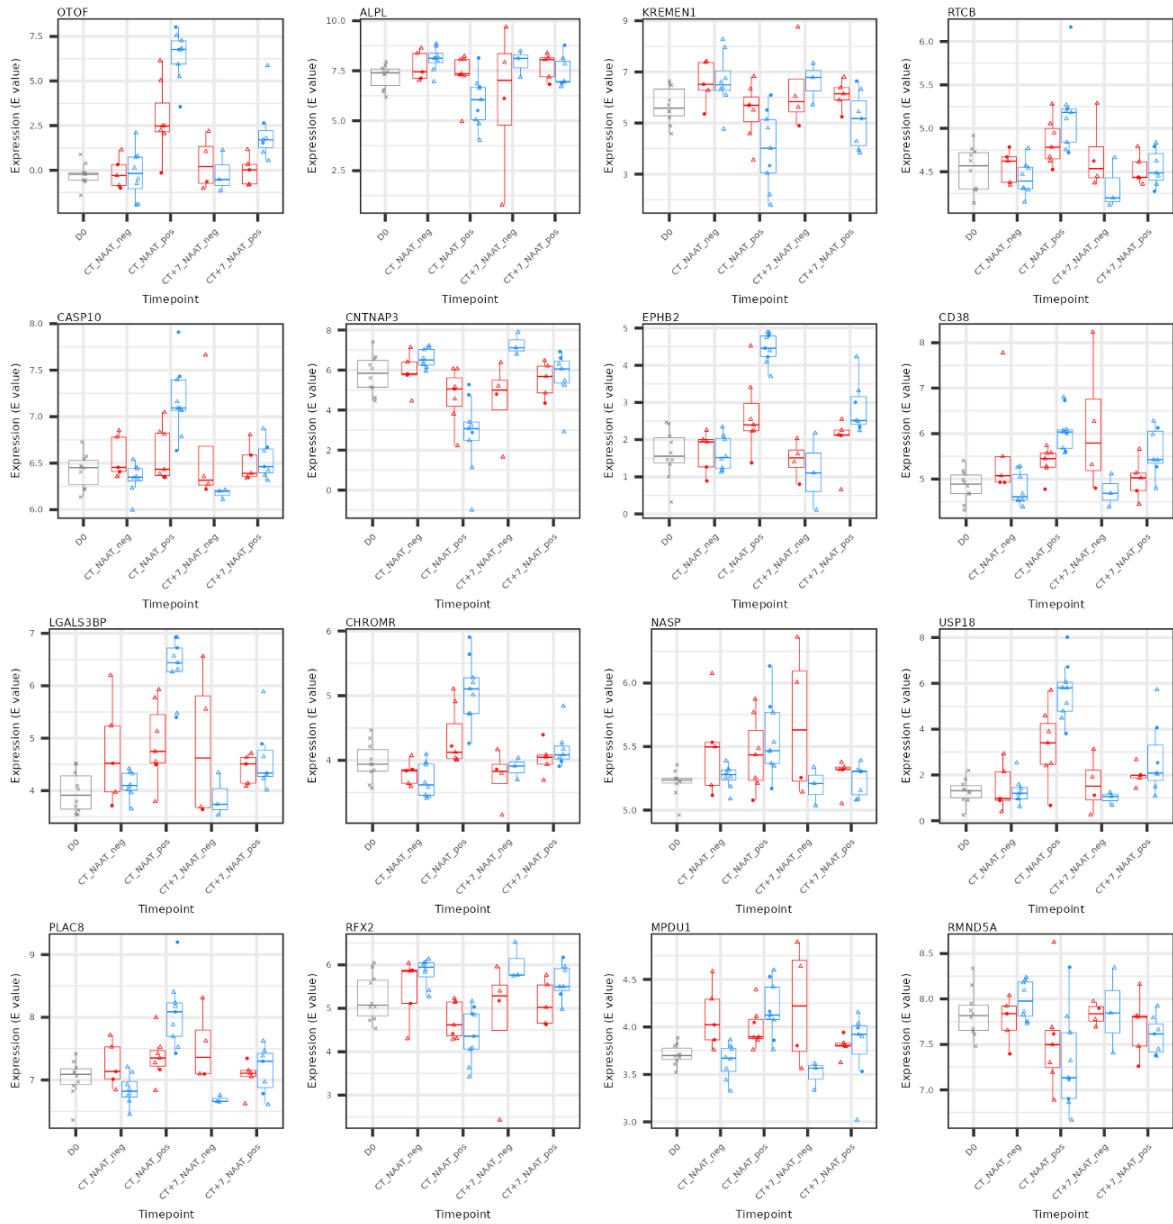

162  
163  
164  
165  
166  
167

Supplementary figure 7: Dot plots of stage 1 data displaying the expression levels of the 16 most differentially expressed genes between vaccine groups at COVID-19 symptom onset in the stage 2 study dataset. D0 n=10, CT NAAT-ve ChAdOx1 nCoV-19 n=5, CT NAAT-ve placebo n=8, CT NAAT+ve ChAdOx1 nCoV-19 n=7, CT NAAT+ve placebo n=9, CT+7 NAAT-ve ChAdOx1 nCoV-19 n=3, CT+7 NAAT-ve placebo n=4, CT+7 NAAT+ve ChAdOx1 nCoV-19 n=5, CT+7 NAAT+ve placebo n=7. The whiskers mark the Q1 – 1.5\*IQR and Q3 + 1.5\*IQR.

168  
169



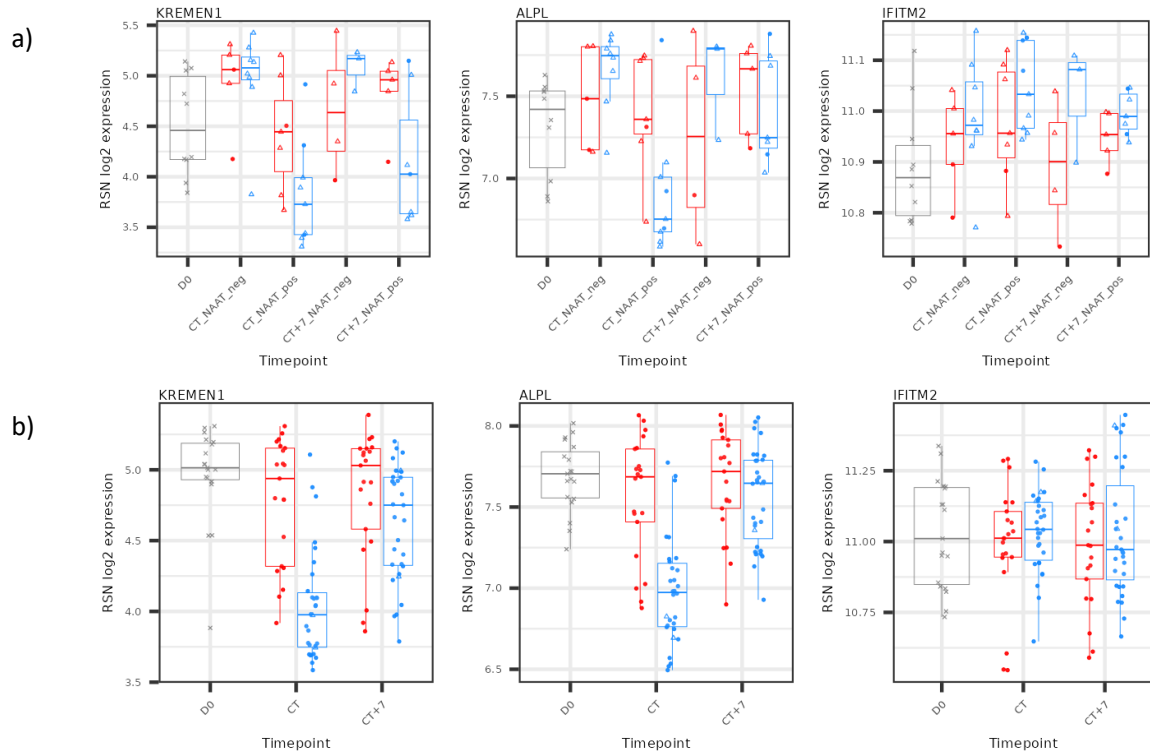

170  
 171 Supplementary figure 8: Dot plots displaying selected imputed gene expression levels in neutrophils from CibersortX  
 172 analysis for a) stage 1, D0 n=10, CT NAAT-ve ChAdOx1 nCoV-19 n=5, CT NAAT-ve placebo n=8, CT NAAT+ve ChAdOx1  
 173 nCoV-19 n=7, CT NAAT+ve placebo n=9, CT+7 NAAT-ve ChAdOx1 nCoV-19 n=3, CT+7 NAAT-ve placebo n=4, CT+7  
 174 NAAT+ve ChAdOx1 nCoV-19 n=5, CT+7 NAAT+ve placebo n=7; and b) stage 2, D0 n=19, CT NAAT+ve ChAdOx1 nCoV-  
 175 19 n=21, CT NAAT+ve placebo n=30, CT+7 NAAT+ve ChAdOx1 nCoV-19 n=21, CT+7 NAAT+ve placebo n=31. The  
 176 whiskers mark the  $Q1 - 1.5 \times IQR$  and  $Q3 + 1.5 \times IQR$ .

177  
 178

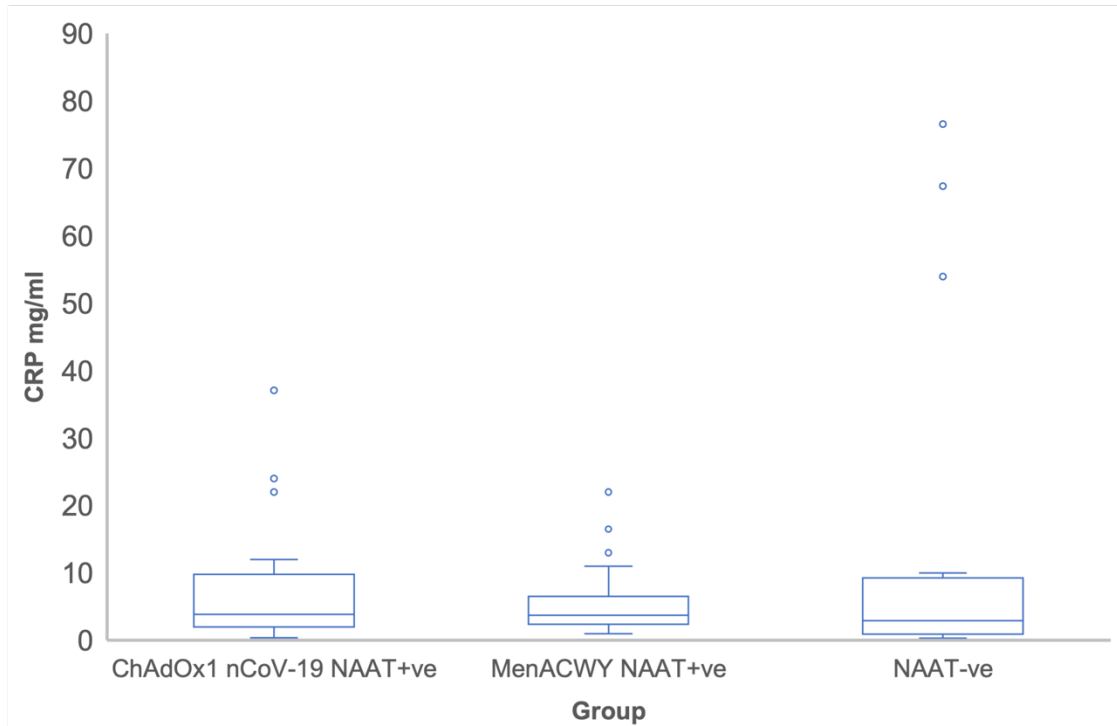

179 Supplementary figure 9: CRP results at CT for Stage 1 and Stage 2 combined. ChAdOx1 NAAT+ve n=28; placebo  
 180 NAAT+ve n=40, NAAT-ve n=18. The whiskers mark the Q1 – 1.5\*IQR and Q3 + 1.5\*IQR.

181  
 182

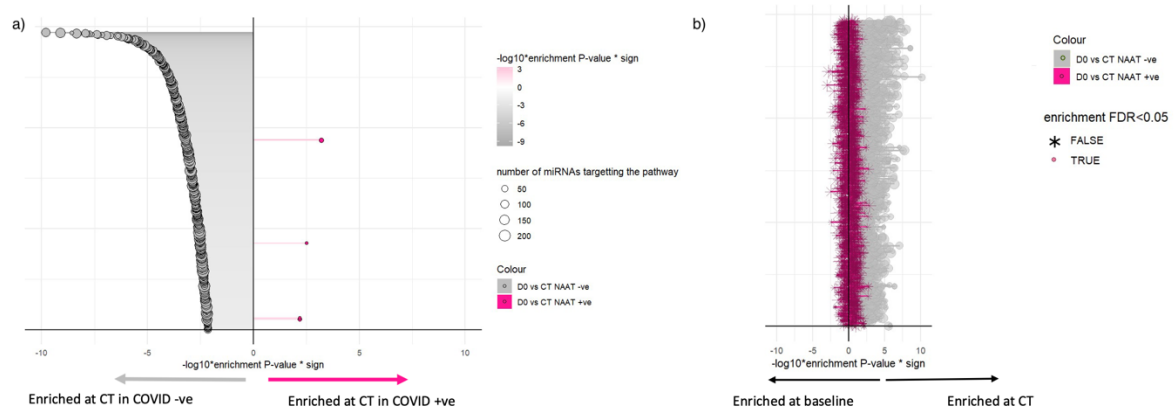

183 Supplementary figure 10: Stage 1 data indicated increased miRNA targeting of immune pathways in NAAT-ve  
 184 participants compared with participants with COVID-19. a) MIEAA pathway enrichment output using the results of  
 185 the miRNA expression analysis comparing CT NAAT-ve (n=13) versus CT NAAT+ve (n=16) ranked by t statistic.  
 186 Significance testing obtained via MIEAA which uses a GSEA analysis approach. Only results with FDR < 0.05 are  
 187 shown. Pathways which are more enriched for targeting at CT in the NAAT-ve group are coloured grey and plot  
 188 towards the left. Pathways which are more enriched for targeting at CT in the NAAT-ve group are coloured pink and  
 189 plot towards the right. b) For the pathways shown in a), target enrichment results from MIEAA2 using the results  
 190 (ranked by t statistic) of baseline (D0, n=10) versus CT NAAT-ve (grey, n=13) and baseline versus CT NAAT+ve (pink,  
 191 n=16). Pathways which are more enriched for targeting at baseline plot to the left. Pathways which are more enriched  
 192 for targeting at CT plot towards the right. Pathways are plotted irrespective of whether they were FDR significant.  
 193 Significance testing obtained via MIEAA which uses a GSEA analysis approach.

195  
 196  
 197  
 198

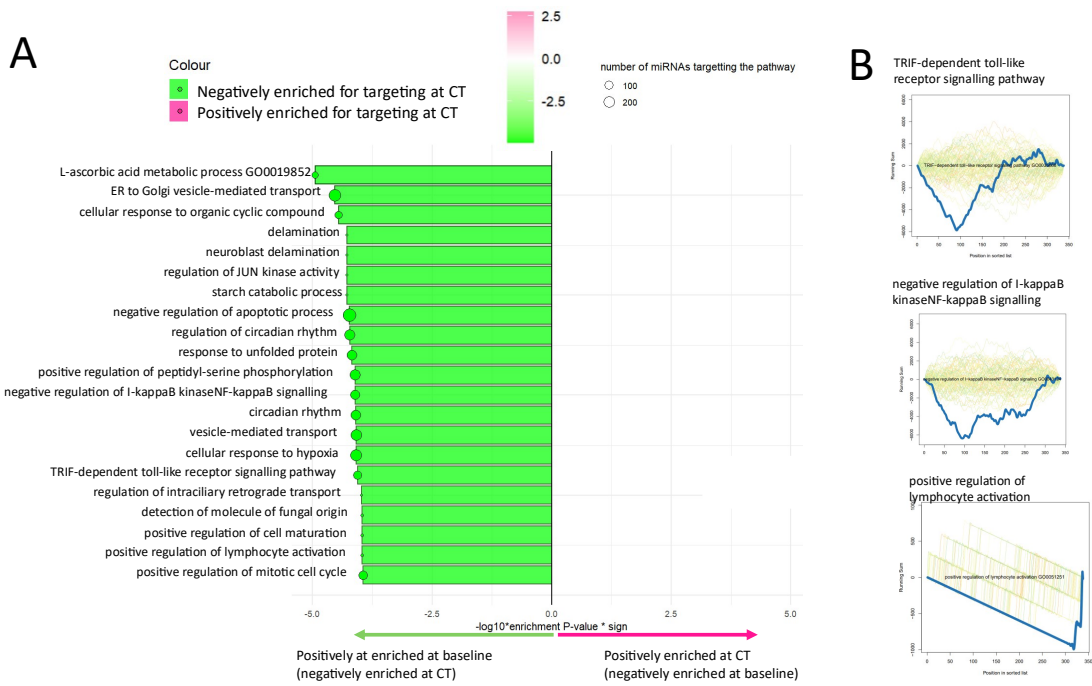

Supplementary figure 11: Stage 2 data: Gene ontology pathways enriched at CT compared with baseline. a) Enrichment analysis results comparing symptom onset in COVID-positive and baseline. Enrichment results presented for significantly enriched pathways based on miRNA expression levels comparing NAAT+ve CT (n=1) with baseline (D0, n=19). Each dot represents the result for a different pathway. Only pathways enriched at an FDR<0.05 are shown. The MIEA2 software does not return enrichment scores; therefore, the  $-\log_{10}$  of the p-values are presented alongside the direction of enrichment indicated. Pathways positively enriched for targeting (i.e. pathways predicted to be subject to greater miRNA expression) at baseline (i.e. negatively enriched in the COVID-19 positive group) plot towards the left and are coloured green. Pathways positively enriched for targeting in the COVID-19 positive group plot towards the right and are coloured pink. The magnitude of enrichment is represented by the distance from 0 on the x-axis and the intensity of the colour of the dots and bar. The plot shows that all pathways were more enriched for targeting at baseline, indicating that miRNAs limit pathway expression during health. Significance testing obtained via MIEAA which uses a GSEA analysis approach. B) Examples of enrichment plots for three pathways are shown in plot a).

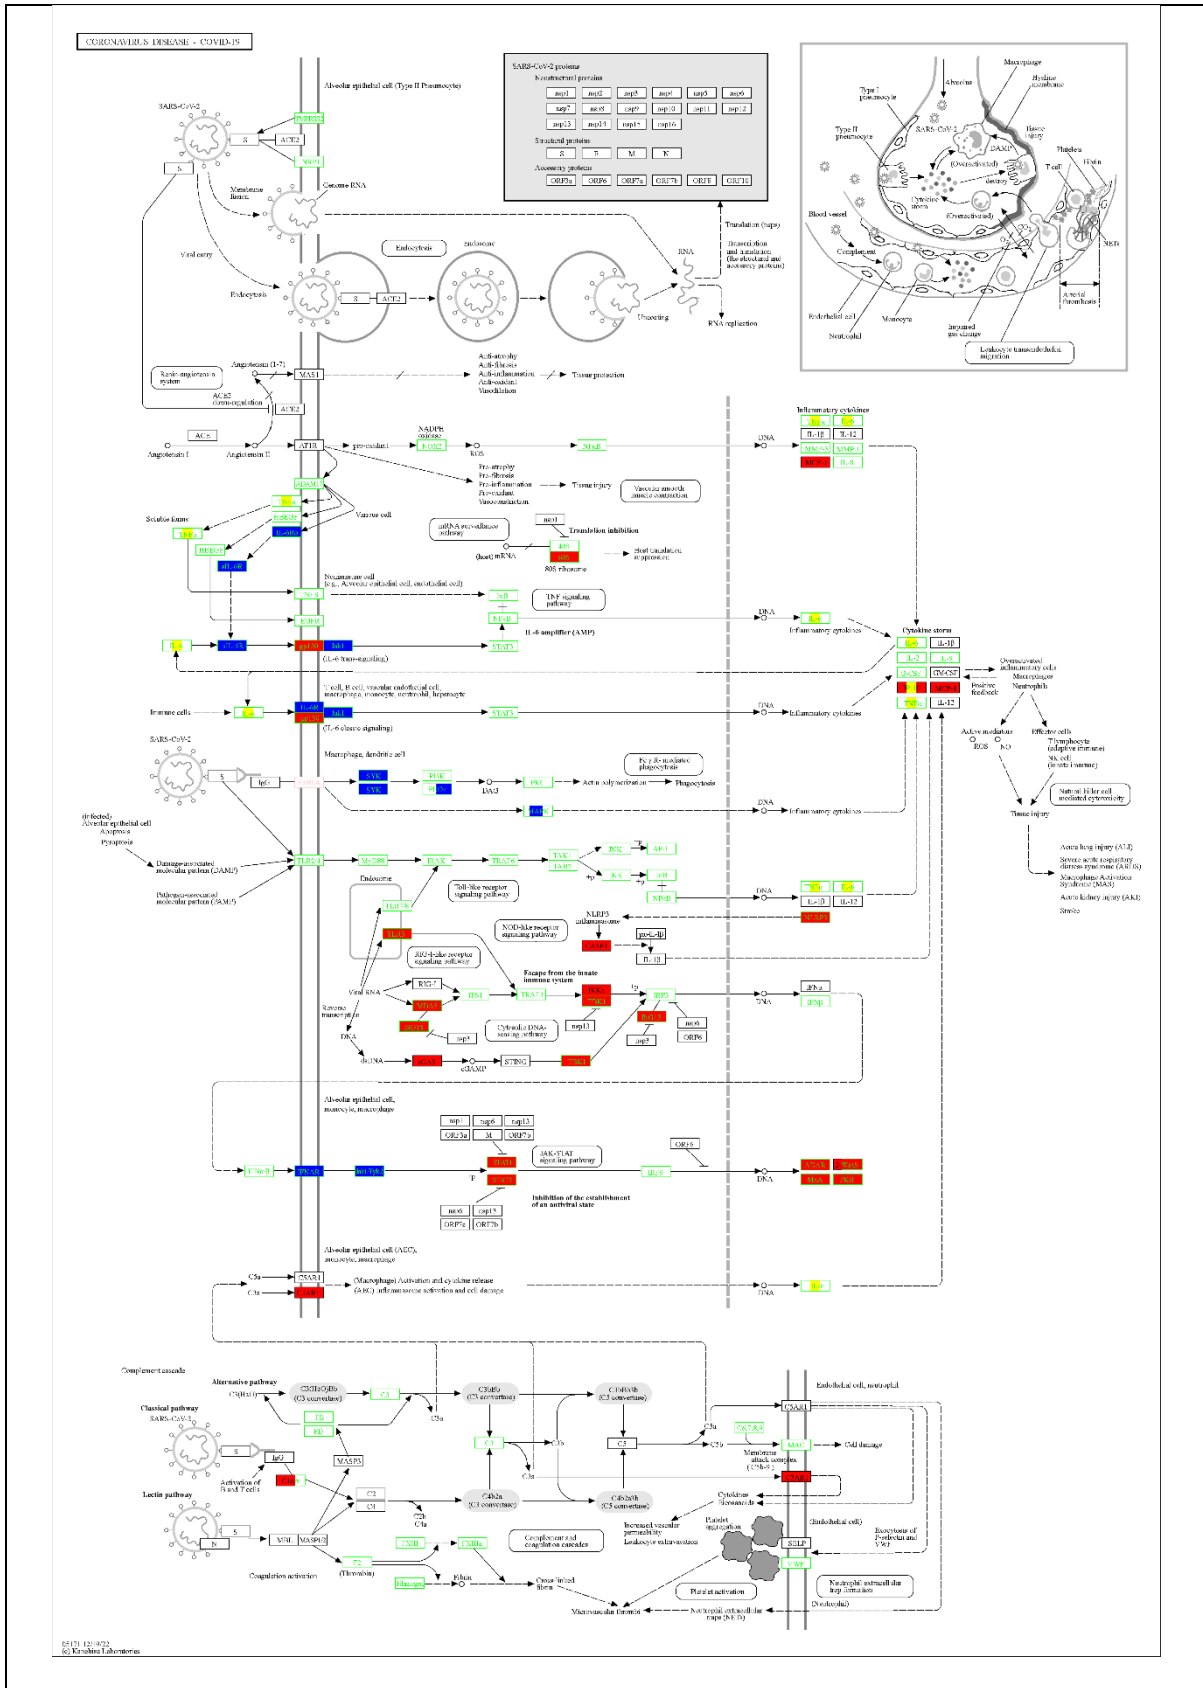

200 Supplementary figure 12: COVID-19 DISEASE KEGG pathway with differentially expressed features highlighted.  
 201 Differentially expressed features are those that were identified in the baseline vs CT NAAT+ve analyses in this  
 202 manuscript. Green outline and text = targets of differentially expressed miRNA, red fill = upregulated at the mRNA  
 203 level, blue fill = downregulated at the mRNA level, internal yellow stripe = upregulated in serum at the protein level.

204 Pink outline – an sRNA that lies reverse complement to FCGR2 (an antibody FC receptor) was downregulated.  
 205 Pathway was rendered via the KEGG pathway database accessible at <https://www.genome.jp/kegg/pathway.html>.

206

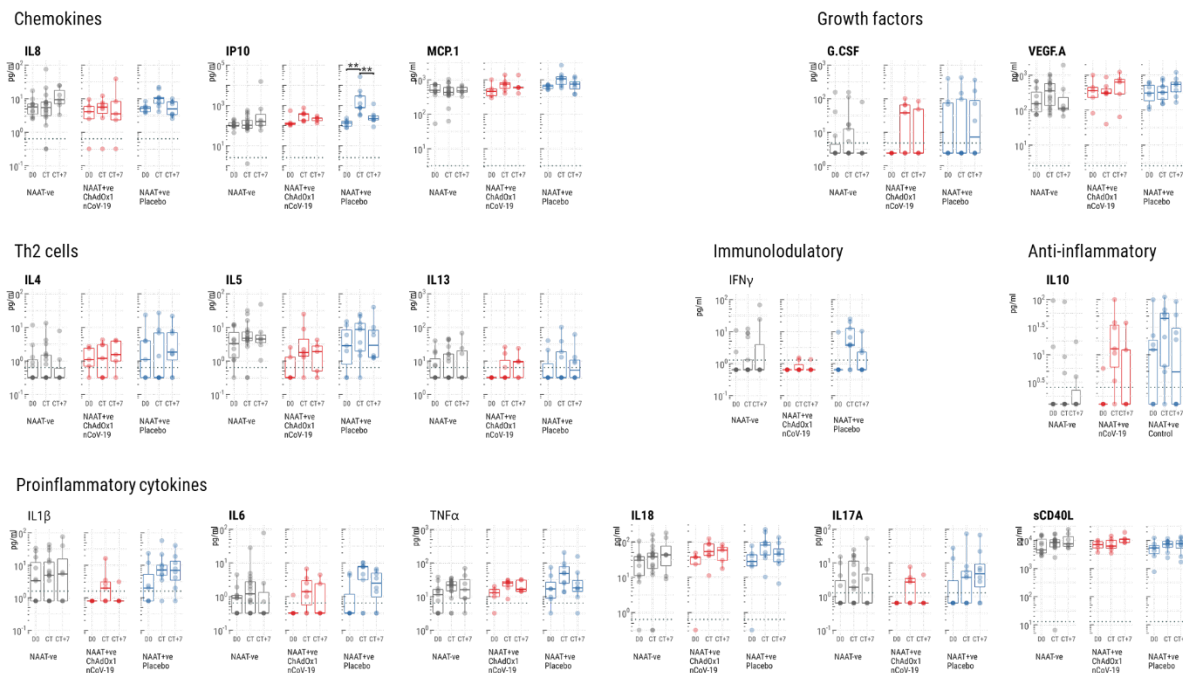

207  
 208 Supplementary figure 13: Trend of serum cytokine concentrations on time at Stage 1. Levels (pg/ml) of 16 detectable  
 209 cytokines (Chemokines IL8, IP10 and MCP1, growth factors G.CSF and VEGF.A, type 2 cytokines IL4, IL5 and IL13,  
 210 immunomodulatory IFN $\gamma$ , anti-inflammatory cytokine IL10 and pro-inflammatory cytokines IL1 $\beta$ , IL6, TNF $\alpha$ , IL18,  
 211 IL17A and sCD40L) measured by Luminex on Stage1 before vaccinations (D0), around symptom onset (CT) and 7  
 212 days later (CT+7) in NAAT-ve (grey, D0 n=11, CT n=17, CT+7 n=7), NAAT+ve receiving ChAdOx1 nCoV-19 vaccine (red,  
 213 D0 n=5, CT n=7, CT+7 n=5) and NAAT+ve who received the placebo vaccine (blue, D0 n=7, CT n=9, CT+7 n=8). Each  
 214 dot represents a volunteer, displayed with medians and IQRs. The dotted line indicates the limit of detection, and  
 215 values below the limit of detection were assigned a value of half the limit of detection. Statistical comparisons were  
 216 applied among the 3 groups at each time point by two-sided unpaired Wilcoxon test with FDR test for adjusting,  
 217 shown as \*FDR < 0.05, \*\*FDR < 0.01, \*\*\*FDR < 0.001.

218

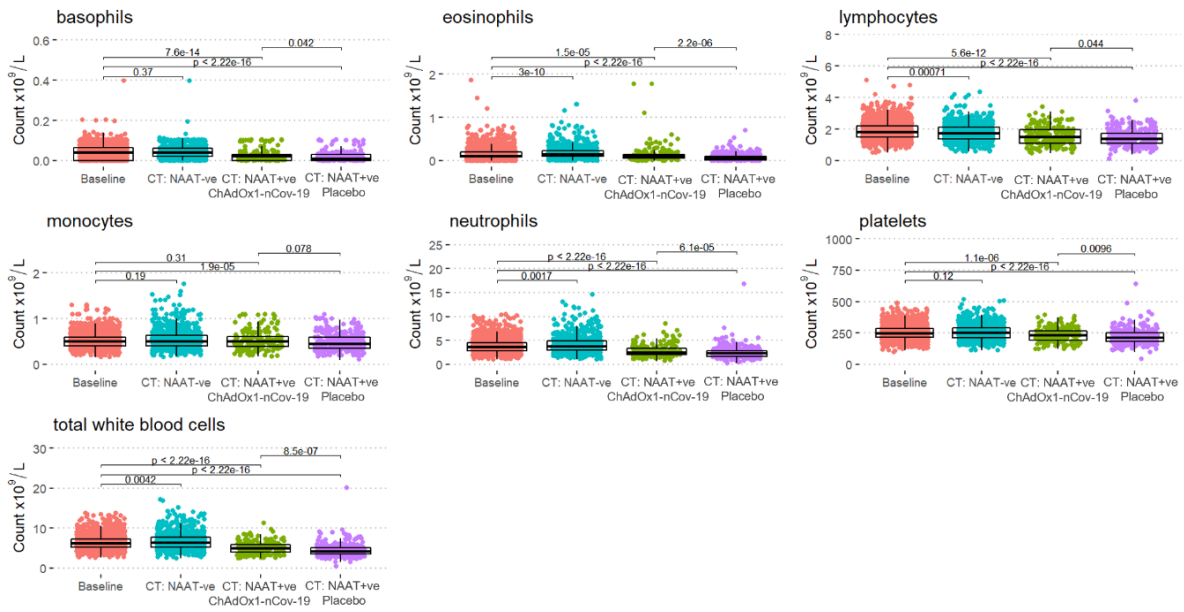

219

220 Supplementary figure 14: Full blood count breakdown at baseline and CT across groups measured by clinical  
 221 complete blood counts. Baseline, D0 n=2276, CT NAAT-ve n=835, CT NAAT+ve ChAdOx1 nCov-19 n=190, CT  
 222 NAAT+ve placebo n=327. Each dot represents a volunteer. The centre line denotes the median value (50th percentile,  
 223 Q2), the box contains the 25th (Q1) to 75th (Q3) percentiles of dataset. The whiskers mark the Q1 – 1.5\*  
 224 IQR, and Q3 + 1.5\*IQR. P-values were derived from two-sided Wilcoxon rank-sum tests. Source data are provided as a Source Data  
 225 file.

226

227

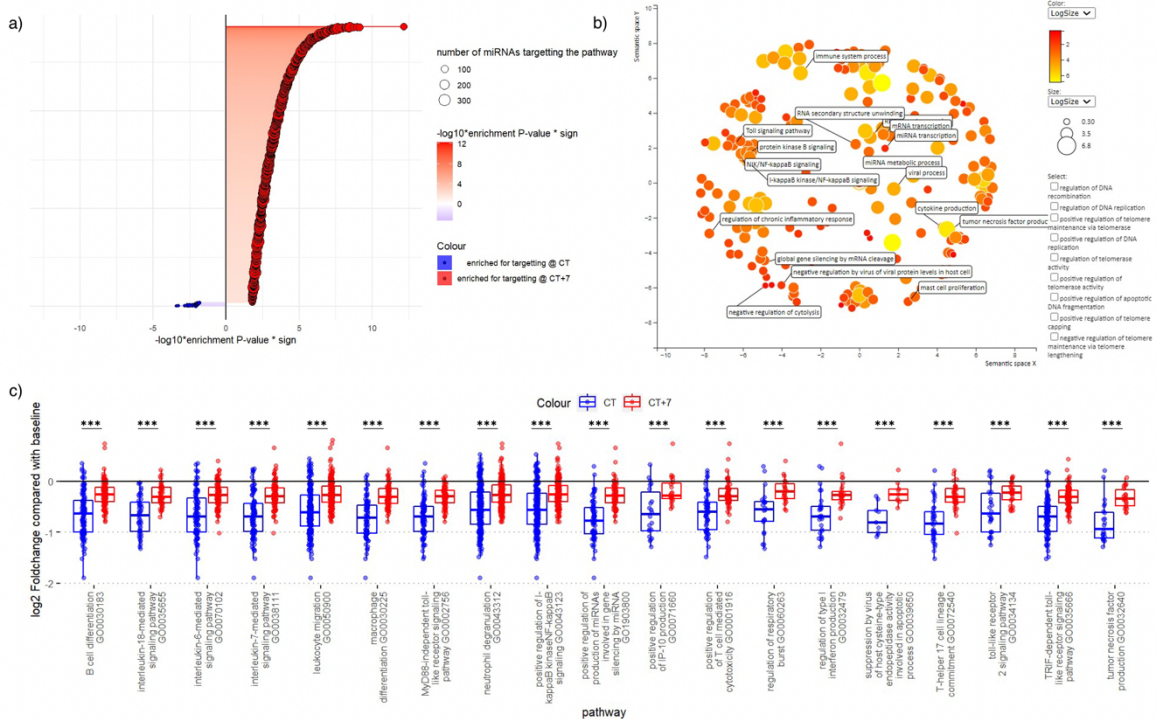

228

229 Supplementary figure 15: Restoration of miRNA expression 7 days after COVID-19 onset reimposes post  
 230 transcriptional regulation of immune pathways. Stage 2 data. a) miRNA pathway enrichment results for CT vs CT+7  
 231 showing enriched GO:BP terms. Significance testing obtained via MIEAA which uses a GSEA analysis approach. b)

232 REVIGO summary of significantly enriched GO:BP. c) Examples of log<sub>2</sub> foldchanges of miRNAs that target genes in  
 233 CT+7 enriched immune-related pathways shown in a), CT NAAT+ve n=51, CT+7 NAAT+ve n=52.

234  
 235  
 236  
 237  
 238  
 239  
 240  
 241

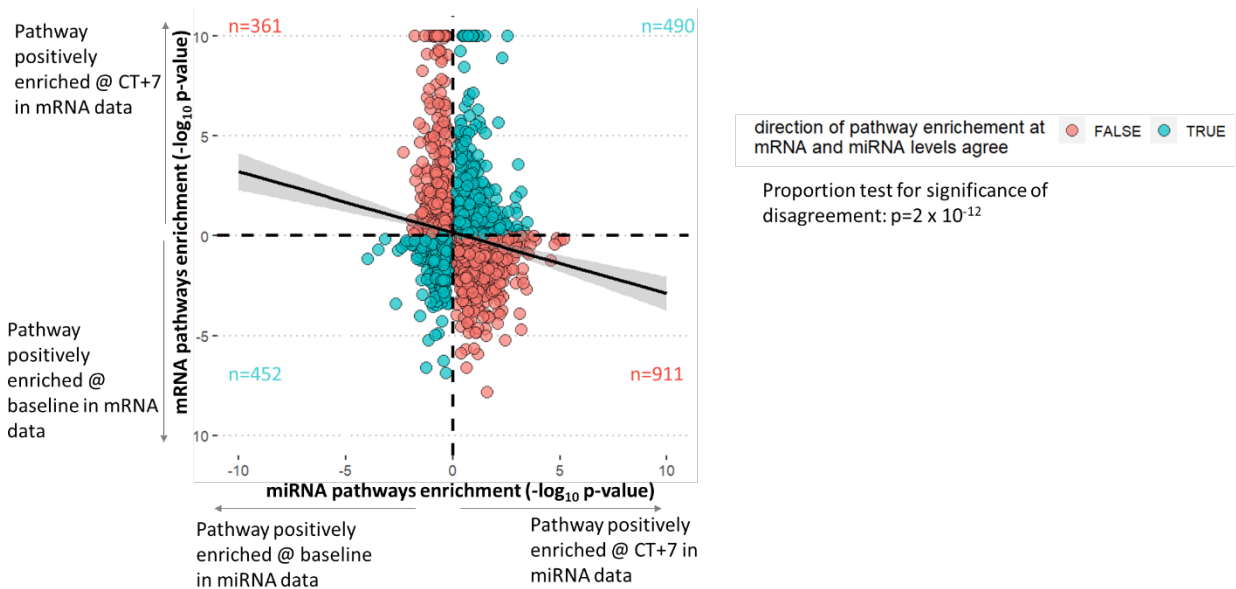

242  
 243 Supplementary figure 16: Stage 2 data. Agreement plot for GO:BP enrichment in the mRNA and miRNA data. Each  
 244 dot represents the results of a pathway. The x-axis shows the log<sub>10</sub> of the p-value of the pathway enrichment in the  
 245 miRNA data. The y-axis shows the log<sub>10</sub> of the p-value of the pathway enrichment in the mRNA data multiplied by the  
 246 enrichment sign (+1 if positive, -1 if negative). The colour indicates whether the sign of miRNA enrichment and mRNA  
 247 enrichment results for a pathway agree (blue) or disagree (red). This can also be gauged from the quadrants of the  
 248 graph the pathway lies in. The numbers in each quadrant show how many pathways fall in that quadrant. The results  
 249 for all pathways tested in the miRNA and mRNA data are shown. Spearman rank  $r = -0.14$ ,  $p = 1.38 \times 10^{-11}$ .

250  
 251

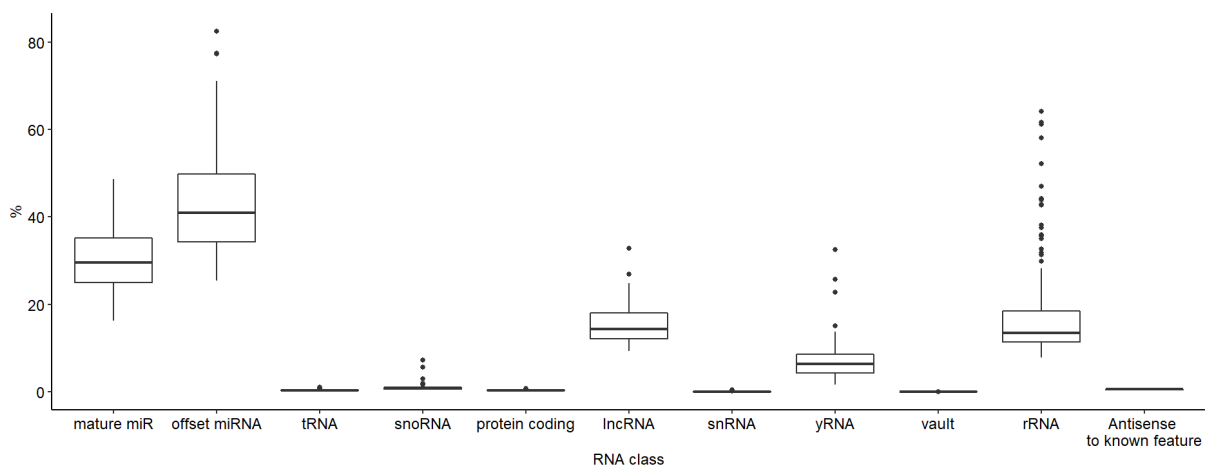

252

253 *Supplementary figure 17: Stage 2 Relative abundance of each sRNA class captured by sRNA sequencing in stage 2.*  
 254 Each boxplot summarises the total expression of each RNA class across samples (n=122). The whiskers mark the Q1  
 255 – 1.5\*IQR and Q3 + 1.5\*IQR.

256  
 257

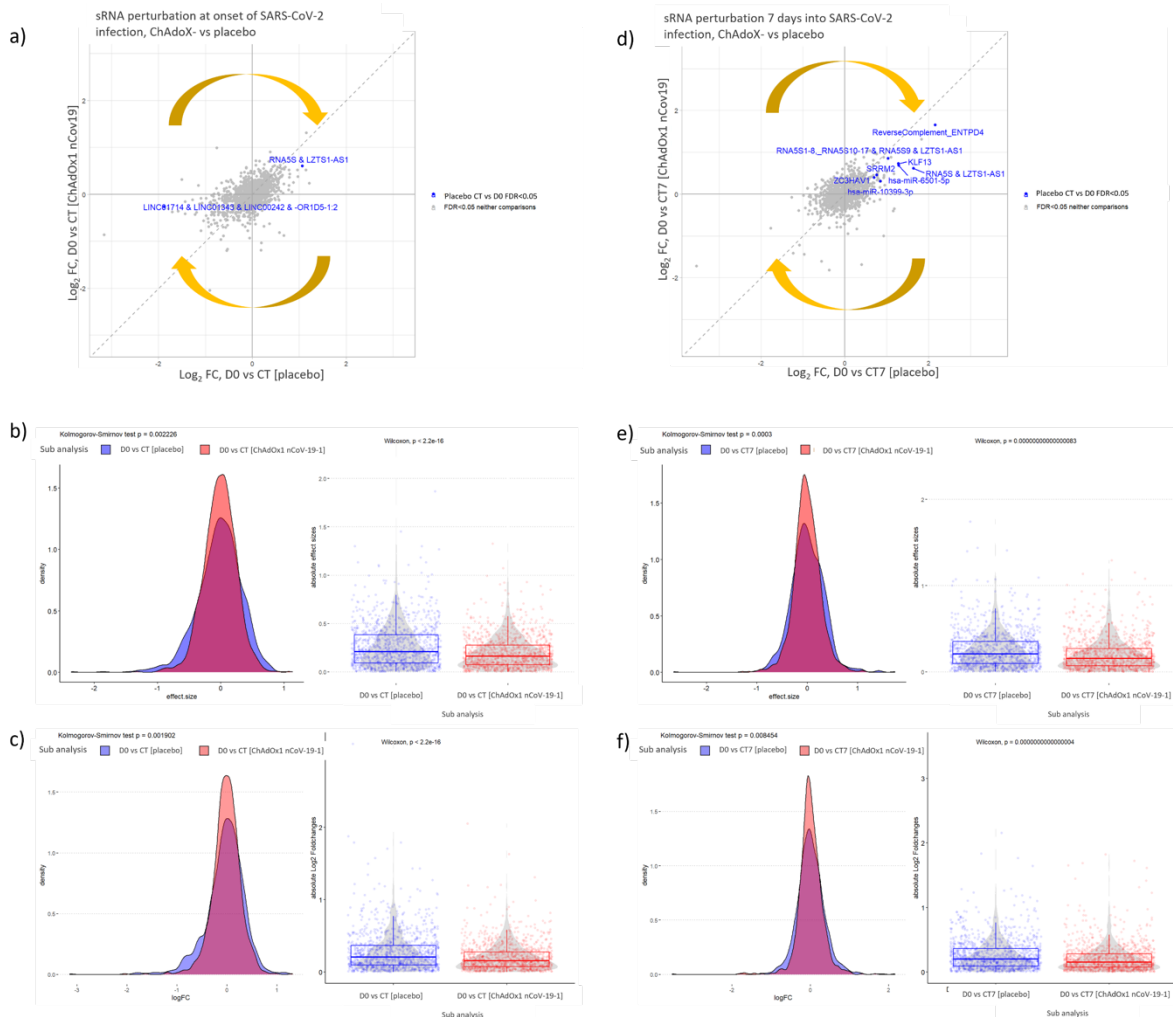

258 *Supplementary figure 18: Stage 1 data shows ChAdOx1 nCoV-19 attenuates sRNA change at COVID-19 onset and 7*  
 259 *days later. a) Agreement plot of differentially expressed genes at NAAT+ve CT vs baseline in Placebo (x-axis, n=9) and*  
 260 *ChAdOx1 nCoV-19 (y-axis, n=7) vaccine recipients compared with baseline (D0, n=10) in the sRNA. Yellow arrows*  
 261 *highlight direction of changes observed compared to baseline. b) Comparing the distribution of effect sizes (left) and*  
 262 *box plot of absolute effect sizes (right) between NAAT+ve CT vs baseline (D0, n=10) in Placebo (blue, n=9) and*  
 263 *ChAdOx1 nCoV-19 (red, n=7) vaccine recipients in the sRNA data. Significance values comparing the distribution*  
 264 *(two-sided Kolmogorov-Smirnov) and average absolute effect size between the vaccine groups shown on plots. c)*  
 265 *Comparing the distribution of log<sub>2</sub> foldchange (left) and box plot of absolute log<sub>2</sub> foldchange (right) between NAAT+ve*  
 266 *CT vs baseline (D0, n=10) in Placebo (blue, n=9) and ChAdOx1 nCoV-19 (red, n=7) vaccine recipients in the sRNA*  
 267 *data. Significance values comparing the distribution (two-sided Kolmogorov-Smirnov) and average absolute log<sub>2</sub>*  
 268 *foldchange between the vaccine groups shown on plots. d) Agreement plot of differentially expressed genes at*  
 269 *NAAT+ve CT+7 vs baseline in Placebo (x-axis, n=7) and ChAdOx1 nCoV-19 (y-axis, n=5) vaccine recipients compared*  
 270 *with baseline (D0, n=10) in the sRNA. Yellow arrows highlight direction of changes observed compared to baseline. e)*  
 271 *Comparing the distribution of effect sizes (left) and box plot of absolute effect sizes (right) between NAAT+ve CT+7 vs*  
 272 *baseline (D0, n=10) in Placebo (blue, n=7) and ChAdOx1 nCoV-19 (red, n=5) vaccine recipients in the sRNA data.*  
 273 *Significance values comparing the distribution (two-sided Kolmogorov-Smirnov) and average absolute effect size*  
 274 *between the vaccine groups shown on plots. f) Comparing the distribution of log<sub>2</sub> foldchange (left) and box plot of*  
 275 *absolute log<sub>2</sub> foldchange (right) between NAAT+ve CT+7 vs baseline (D0, n=10) in Placebo (blue, n=7) and ChAdOx1*  
 276 *nCoV-19 (red, n=5) vaccine recipients in the sRNA data. Significance values comparing the distribution (two-sided*  
 277 *Kolmogorov-Smirnov) and average absolute log<sub>2</sub> foldchange between the vaccine groups shown on plots.*  
 278

279



a) CT7 Placebo vs CT7 ChAdOx1 nCoV-19  
Positively enriched in placebo group at CT+7 stage II data  
P= 0.000365  
FDR = 0.04966978

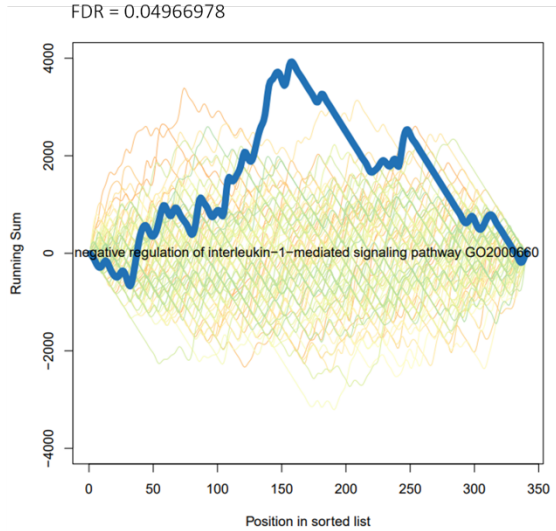

b) CT7 Placebo vs CT7 ChAdOx1 nCoV-19  
Positively enriched in placebo group at CT\_7 stage I data  
P=0.011

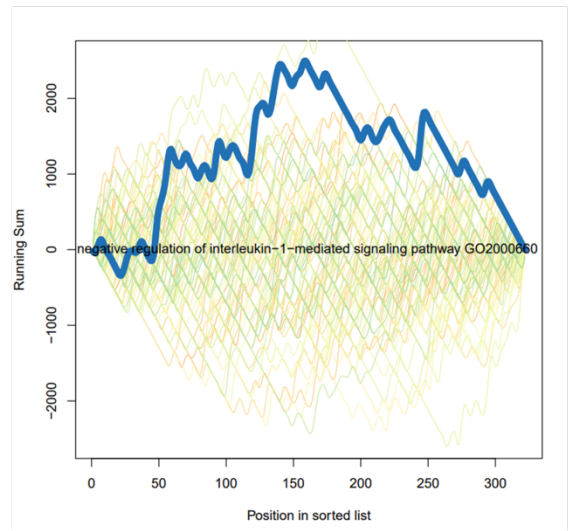

280  
281

282 Supplementary figure 19: Example of a GO:BP pathway differentially enriched between placebo and ChAdOx1 nCoV-  
283 19 groups in stage 2 and confirmed in stage 1 data. Running sum of the “negative regulation of interleukin-1-  
284 mediated signalling pathway” derived from MIEAA2 GSEA style analysis in a) the stage 2 data (CT+7 ChAdOx1 nCoV-  
285 19 n=21, CT+7 placebo n=31) and b) stage 1 data (CT+7 ChAdOx1 nCoV-19 n=5, CT+7 placebo n=7). Figure  
286 downloaded from MIEA website: <https://www.ccb.uni-saarland.de/mieaa2>. miRNAs inputted into GSEA analysis  
287 ranked by t-statistic ranked from most upregulated at CT+7 in the placebo vs ChAdOx1 nCoV-19 group to most  
288 downregulated at CT+7 in the placebo vs ChAdOx1 nCoV-19 group.

289  
290  
291  
292

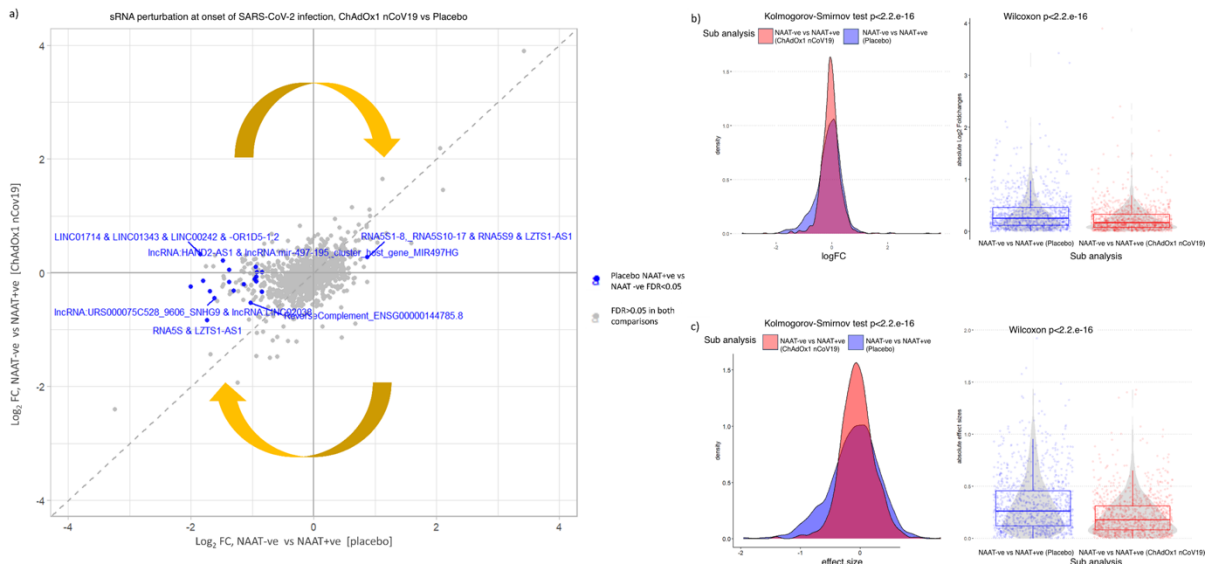

293  
294  
295  
296  
297  
298  
299  
300

Supplementary figure 20: More profound changes in sRNA expression in COVID-19 in placebo compared with ChAdOx1 nCoV-19 vaccinees. a) Agreement plot of differentially expressed genes at CT NAAT+ve vs CT NAAT-ve in Placebo (x-axis, CT NAAT-ve n=8, CT NAAT+ve n=9) and ChAdOx1 nCoV-19 (y-axis, CT NAAT-ve n=5, CT NAAT+ve n=7) vaccine recipients in the sRNA data. Yellow circular lines represent the direction of changes observed in NAAT+ve compared to NAAT-ve. b) Stage 1 data. Comparing the distribution of  $\log_2$  foldchange (left) and box plot of absolute  $\log_2$  foldchange (right) between CT NAAT+ve vs CT NAAT-ve in Placebo (blue, CT NAAT-ve n=8, CT NAAT+ve n=9) and ChAdOx1 nCoV-19 (red, CT NAAT-ve n=5, CT NAAT+ve n=7) vaccine recipients in the sRNA data. Significance values

301 comparing the distribution (two-sided Kolmogorov-Smirnov) and average *log2 foldchange* between the vaccine  
 302 groups shown on plots. c) Stage 1 data. Comparing the distribution of *effect sizes* (left) and box plot of *absolute*  
 303 *effect sizes* (right) between NAAT+ve CT vs NAAT-ve CT in Placebo (blue, CT NAAT-ve n=8, CT NAAT+ve n=9) and  
 304 ChAdOx1 nCoV-19 (red, CT NAAT-ve n=5, CT NAAT+ve n=7) vaccine recipients in the sRNA data. Significance values  
 305 comparing the distribution (Kolmogorov-Smirnov) and average absolute effect size between the vaccine groups given  
 306 at tops of plots.

307  
 308  
 309  
 310  
 311  
 312

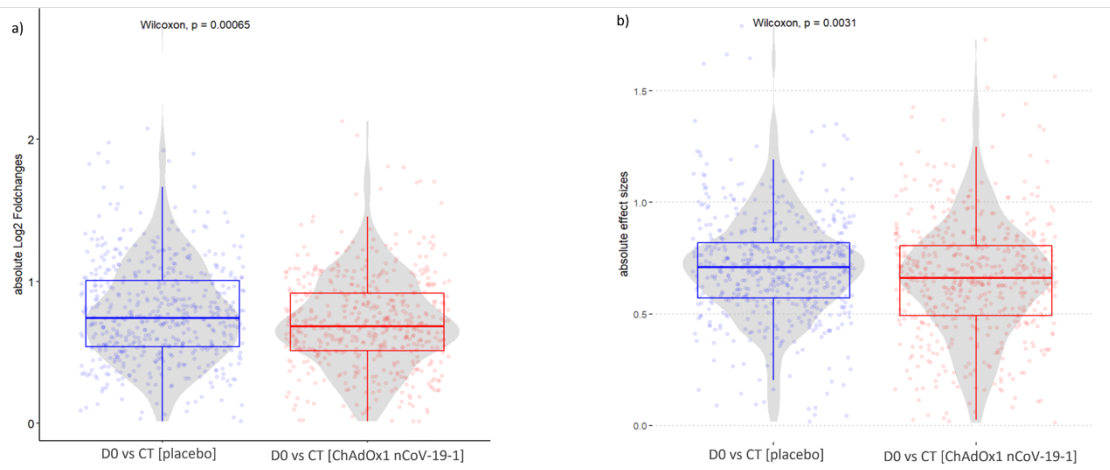

313

314 Supplementary figure 21: Stage 2 data shows ChAdOx1 nCoV-19 attenuates sRNA change at COVID-19 onset a)  
 315 Comparing absolute log<sub>2</sub> foldchange in between NAAT+ve CT vs baseline (D0, n=19) in individuals in Placebo (blue,  
 316 n=30) and ChAdOx1 nCoV-19 (red, n=21) vaccine recipients in the sRNA data for genes differentially expressed (FDR<  
 317 0.05) in at least one of the groups compared with baseline. Significance values comparing the and average absolute  
 318 effect size between the vaccine groups given at to of plot. b) Comparing absolute effect sizes between NAAT+ve CT  
 319 vs baseline (D0, n=19) in individuals in Placebo (blue, n=30) and ChAdOx1 nCoV-19 (red, n=21) vaccine recipients in  
 320 the sRNA data for genes differentially expressed (FDR< 0.05) in at least one of the groups compared with baseline.  
 321 Significance value comparing the and average absolute effect size between the vaccine groups given at top of plot –  
 322 two-sided Wilcoxon test used.

323

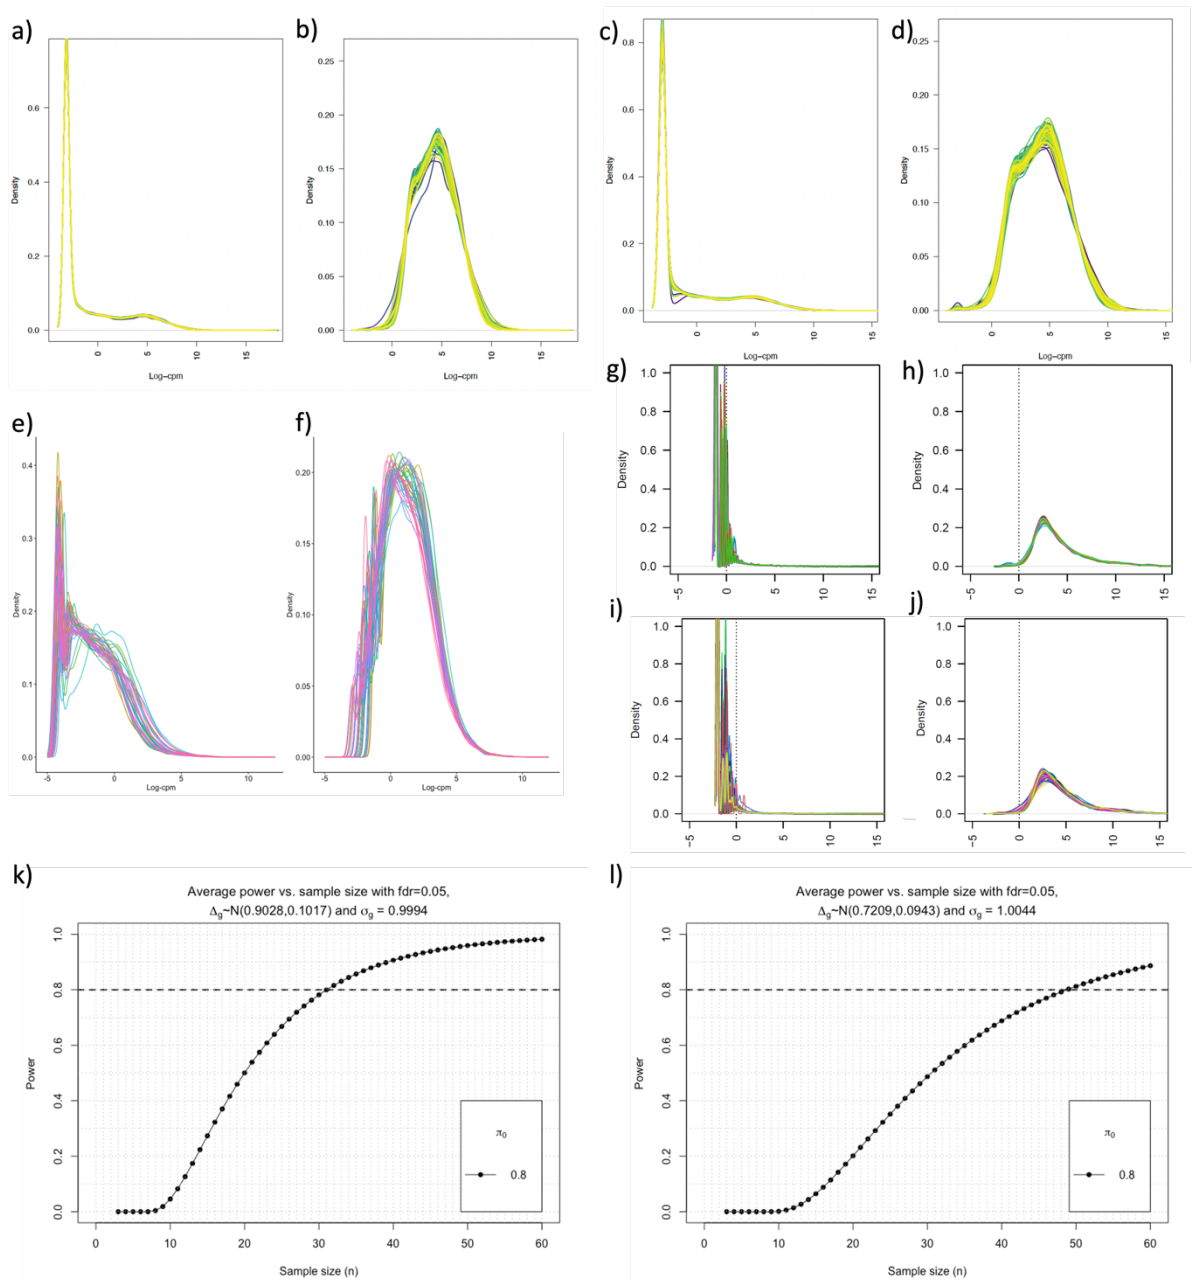

324  
 325 Supplementary figure 22: Density plots before and after filtering of the features, each line represents a single sample.  
 326 a) Illumina nex-gen RNA-seq, stage 1 data before filtering (n=58 samples). b) Illumina nex-gen RNA-  
 327 sequencing, stage 1 data after filtering (n=58 samples). c) Illumina nex-gen RNA-seq, stage 2 data before  
 328 filtering (n=122 samples). d) Illumina nex-gen RNA-seq, stage 2 data after filtering (n=122 samples). e) ONT  
 329 3<sup>rd</sup>-gen RNA sequencing, stage 1 data before filtering (n=39 samples). f) ONT 3<sup>rd</sup>-gen RNA sequencing, stage 1 data  
 330 after filtering (n=39 samples). g) Small RNA-seq, stage 1 data before filtering (n=58 samples). h) Small RNA-  
 331 sequencing, stage 1 data after filtering (n=58 samples). i) Small RNA-seq, stage 2 data before filtering (n=122  
 332 samples). j) Small RNA-seq, stage 2 data after filtering (n=122 samples). k) Average power vs sample size for  
 333 stage 1 cohort (n=58 samples) for next-gen RNA seq. l) Average power vs sample size for stage 1 cohort (n=58  
 334 samples) for small RNA seq. Derived using the ssize package in R.

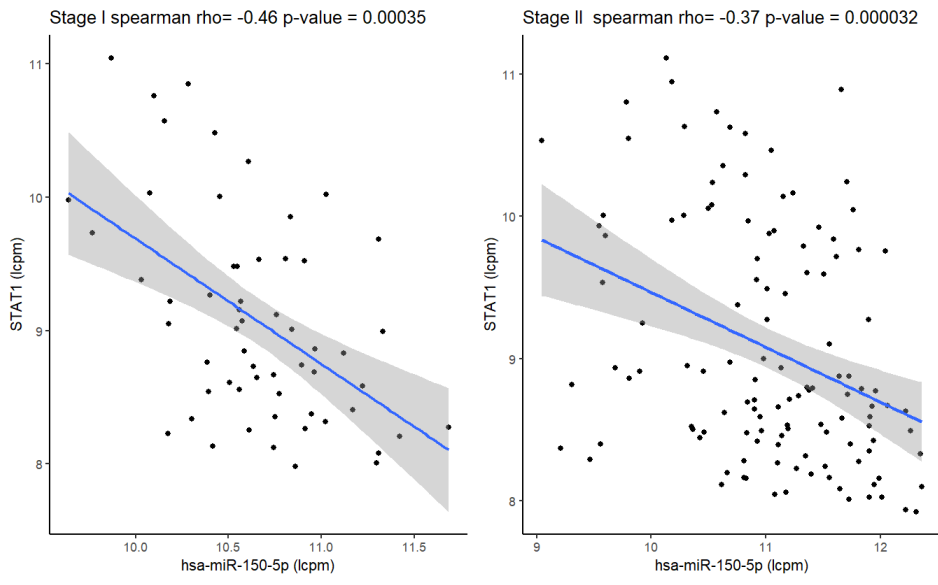

336  
337

338 Supplementary figure 23: Correlation between the expression of hsa-miR-150-5p and STAT1 - known experimentally  
 339 validated target pairs. In the stage 2 cohort, STAT1 and hsa-miR-150-5p were up and downregulated respectively  
 340 between baseline and CT at FDR<0.05. Blue line is line of best fit, grey shading represents 95% confidence intervals  
 341 of line of best fit.

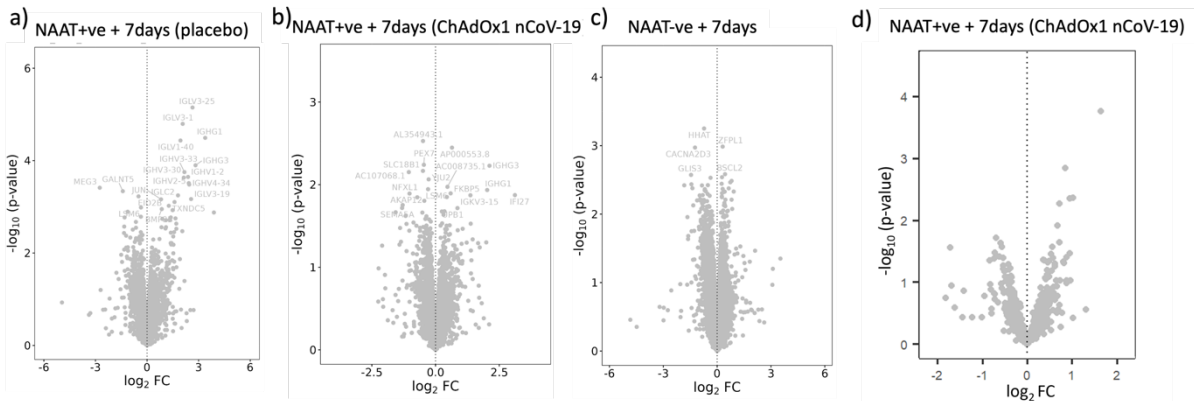

342  
343  
344  
345  
346  
347  
348  
349  
350  
351

342  
343  
344  
345  
346  
347  
348  
349  
350  
351  
352  
353  
354  
355  
356  
357  
358  
359  
360

Supplementary figure 24: Stage 1 data showed no differences in gene expression 7 days after COVID-19 onset when compared with health or covid-like illness a) Volcano plot of next-gen RNA-seq gene expression at CT+7 in NAAT+ve placebo vaccinated individuals (n=7) compared with baseline (D0, n=10) samples. b) Volcano plot of gene expression at CT+7 consistent with COVID-19 in NAAT+ve (ChAdOx1 nCoV-19 nCoV-19, n=5) individuals compared with baseline (D0, n=10) samples. c) Volcano plot of gene expression at CT+7 in NAAT-ve individuals (n=7) compared with baseline (D0, n=10) samples. d) Volcano plot comparing the small RNA-seq blood transcriptome at CT+7 in NAAT+ve (ChAdOx1 nCoV-19, n=5) individuals compared with baseline (D0, n=10) samples. Differential expression analysis was performed using a two-sided moderate t-test.

361 **Supplementary Tables**

362  
363

Supplementary Table 1 – Illness severity assessment and classification criteria

| Severity of illness | Mild                                                                                                                                                                                                                                                                                                                                                           | Moderate A                                                                                                                                                                                                                                                                                                                                                                                                                                                                                              | Moderate B                                                                                                                                                                                                                                                                                                                                                                                                                                                                                      | Severe                                                                                                                                                                                                                                                                                                                                                                                    |
|---------------------|----------------------------------------------------------------------------------------------------------------------------------------------------------------------------------------------------------------------------------------------------------------------------------------------------------------------------------------------------------------|---------------------------------------------------------------------------------------------------------------------------------------------------------------------------------------------------------------------------------------------------------------------------------------------------------------------------------------------------------------------------------------------------------------------------------------------------------------------------------------------------------|-------------------------------------------------------------------------------------------------------------------------------------------------------------------------------------------------------------------------------------------------------------------------------------------------------------------------------------------------------------------------------------------------------------------------------------------------------------------------------------------------|-------------------------------------------------------------------------------------------------------------------------------------------------------------------------------------------------------------------------------------------------------------------------------------------------------------------------------------------------------------------------------------------|
| Features            | <ul style="list-style-type: none"> <li>- Completing full sentences</li> <li>- No SOB</li> <li>- No chest tightness</li> <li>- Able to do ADLs</li> <li>- No other red flags/ concerning features from history &amp; examination</li> </ul> Observations: <ul style="list-style-type: none"> <li>- RR 12-20</li> <li>- HR 50-100</li> <li>- SpO2≥95%</li> </ul> | <ul style="list-style-type: none"> <li>- Completing full sentences</li> <li>- Able to do ADLs but lethargic</li> <li>- Mild chest tightness</li> <li>- Mild SOB on exertion only</li> <li>- No other red flags/ concerning features from history &amp; examination</li> <li>- Any symptoms from other systems considered to be moderate and not requiring medical review</li> </ul> Observations: <ul style="list-style-type: none"> <li>- RR 12-20</li> <li>- HR 50-100</li> <li>- SpO2≥95%</li> </ul> | <ul style="list-style-type: none"> <li>- Completing full sentences</li> <li>- Able to do ADLs but lethargic</li> <li>- Mild chest tightness</li> <li>- Mild SOB on exertion</li> <li>- Any symptoms from other systems considered to be moderate and requiring medical review</li> </ul> Observations (any one of the following automatically classifies as Moderate B): <ul style="list-style-type: none"> <li>- RR 20-24</li> <li>- HR persistently 100-130</li> <li>- SpO2 93-94%</li> </ul> | Any one of the following: <ul style="list-style-type: none"> <li>- Inability to complete full sentences</li> <li>- Unable to do any ADLs/ get out of bed</li> <li>- Any other clinical concerns for severe disease in any system e.g. cyanosis/ confusion</li> </ul> Observations: <ul style="list-style-type: none"> <li>- RR&gt;25</li> <li>- HR &gt;130</li> <li>- SpO2≤92%</li> </ul> |

364  
365  
366

\*SOB - Shortness Of Breath; ADLs - Activities of Daily living; RR - Respiratory Rate; HR – Heart Rate; SpO2 - Oxygen Saturations

367  
368

Supplementary Table 2 – Average RNA-seq statistics

369

Median number of reads obtained via RNA-sequencing

| Data type                              | Stage 1 (IQR)                         | Stage 2 (IQR)                       |
|----------------------------------------|---------------------------------------|-------------------------------------|
| Illumina next-gen RNA sequencing       | 49,480,184<br>(47,059,636-52,301,527) | 39,389,562<br>(38,644,940-40122655) |
| ONT 3 <sup>rd</sup> gen RNA sequencing | 68,773,129<br>(61,366,383-73,932,474) | N/A                                 |
| sRNA                                   | 4,440,745<br>(3,850,706-,962,543)     | 8,226,562<br>(7,762,793-9,738,660)  |

370  
371

Median number of reads mapped to analysed features

| Data type                              | Stage 1 (IQR)                         | Stage 2 (IQR)                         |
|----------------------------------------|---------------------------------------|---------------------------------------|
| Illumina next-gen RNA sequencing       | 45,432,354<br>(43,341,599-48,168,246) | 35,856,747<br>(35,130,346-36,485,071) |
| ONT 3 <sup>rd</sup> gen RNA sequencing | 65,064,582<br>(58,155,344-70,182,215) | N/A                                   |

|      |                                    |                                    |
|------|------------------------------------|------------------------------------|
| sRNA | 4,327,768<br>(3,761,417-4,850,598) | 7,996,464<br>(7,512,018-9,494,672) |
|------|------------------------------------|------------------------------------|

372

373 3<sup>rd</sup> gen RNA sequencing full statistics

| Participant number | timepoint | Vaccine         | NAAT result | Reads      | Mapped     | Read length (avg) | Read length (N50) |
|--------------------|-----------|-----------------|-------------|------------|------------|-------------------|-------------------|
| 1                  | D0        | ChAdOx1 nCoV-19 | 1           | 61,223,233 | 59,336,400 | 773.6             | 794               |
| 1                  | CT        | ChAdOx1 nCoV-19 | 1           | 61,509,533 | 56,974,288 | 822.3             | 826               |
| 2                  | D0        | MenACWY         | 1           | 71,529,753 | 69,395,193 | 769.4             | 795               |
| 2                  | CT        | MenACWY         | 1           | 66,865,545 | 61,294,901 | 754.3             | 788               |
| 3                  | D0        | ChAdOx1 nCoV-19 | 0           | 80,484,979 | 76,185,834 | 774.5             | 798               |
| 3                  | CT        | ChAdOx1 nCoV-19 | 0           | 74,618,760 | 70,753,402 | 758.6             | 790               |
| 4                  | D0        | MenACWY         | 0           | 63,757,599 | 61,411,078 | 795.3             | 807               |
| 4                  | CT        | MenACWY         | 0           | 70,627,104 | 67,958,985 | 796.2             | 801               |
| 5                  | D0        | MenACWY         | 0           | 58,443,341 | 55,884,907 | 762.9             | 801               |
| 5                  | CT        | MenACWY         | 0           | 68,773,129 | 65,770,631 | 760.2             | 794               |
| 6                  | CT        | ChAdOx1 nCoV-19 | 0           | 69,041,764 | 61,783,915 | 764.8             | 797               |
| 7                  | D0        | MenACWY         | 0           | 54,726,104 | 52,497,313 | 793.8             | 796               |
| 7                  | CT        | MenACWY         | 0           | 82,019,086 | 77,922,835 | 765.7             | 790               |
| 8                  | D0        | ChAdOx1 nCoV-19 | 1           | 69,423,042 | 64,450,151 | 747.2             | 790               |
| 8                  | CT        | ChAdOx1 nCoV-19 | 1           | 73,712,350 | 70,947,992 | 777.9             | 790               |
| 10                 | D0        | MenACWY         | 0           | 69,652,518 | 67,461,318 | 778.7             | 795               |
| 10                 | CT        | MenACWY         | 0           | 74,152,597 | 71,595,250 | 778.5             | 797               |
| 11                 | CT        | MenACWY         | 0           | 83,563,860 | 76,533,140 | 719.1             | 792               |
| 12                 | CT        | ChAdOx1 nCoV-19 | 0           | 70,656,550 | 67,859,528 | 762.9             | 794               |
| 13                 | D0        | ChAdOx1 nCoV-19 | 0           | 65,356,356 | 62,585,662 | 770.2             | 797               |
| 13                 | CT        | ChAdOx1 nCoV-19 | 0           | 78,411,489 | 74,987,279 | 798.4             | 804               |
| 14                 | D0        | ChAdOx1 nCoV-19 | 0           | 59,535,378 | 53,493,845 | 656.6             | 779               |
| 14                 | CT        | ChAdOx1 nCoV-19 | 0           | 46,098,368 | 42,667,732 | 734.8             | 794               |
| 15                 | CT        | ChAdOx1 nCoV-19 | 1           | 60,167,407 | 56,291,091 | 809.3             | 802               |
| 16                 | CT        | ChAdOx1 nCoV-19 | 1           | 52,605,013 | 49,110,258 | 838.8             | 829               |
| 17                 | CT        | ChAdOx1 nCoV-19 | 1           | 69,976,056 | 67,089,638 | 786.6             | 791               |
| 18                 | CT        | MenACWY         | 0           | 76,646,832 | 72,037,548 | 768.3             | 794               |
| 19                 | CT        | MenACWY         | 0           | 67,503,893 | 65,153,703 | 762.7             | 785               |
| 20                 | CT        | MenACWY         | 0           | 79,254,110 | 74,444,093 | 782.7             | 791               |
| 21                 | CT        | MenACWY         | 1           | 55,802,655 | 52,079,010 | 843.6             | 818               |
| 22                 | CT        | MenACWY         | 1           | 75,142,851 | 69,611,028 | 747.5             | 802               |
| 23                 | CT        | MenACWY         | 1           | 77,034,672 | 73,609,061 | 749.6             | 785               |

|    |    |                 |   |            |            |       |     |
|----|----|-----------------|---|------------|------------|-------|-----|
| 24 | CT | ChAdOx1 nCoV-19 | 1 | 63,258,789 | 60,330,308 | 798.9 | 796 |
| 25 | CT | MenACWY         | 1 | 56,300,114 | 52,577,416 | 894.9 | 841 |
| 27 | CT | ChAdOx1 nCoV-19 | 1 | 73,638,249 | 69,354,953 | 752.6 | 796 |
| 28 | CT | MenACWY         | 1 | 67,335,178 | 63,159,075 | 806.7 | 805 |
| 29 | CT | MenACWY         | 1 | 63,091,662 | 60,119,537 | 815.3 | 802 |
| 30 | CT | MenACWY         | 1 | 66,850,254 | 65,064,582 | 800   | 811 |
| 32 | CT | MenACWY         | 1 | 52,133,887 | 48,229,727 | 872.7 | 830 |

374  
375  
376  
377  
378

Supplementary Table 3 – Sample size (breakdown by NAAT result, vaccine arm and time point). Vaccine type in NAAT-ve arm is irrelevant as neither the placebo or ChAdOx1 nCoV-19 vaccines would be expected to influence gene expression in a non-COVID illness but we have included vaccine type for completeness nevertheless: Stage 1

|                       | D0        |                             |                       | CT        |                             |                       | CT+7      |                            |                       |
|-----------------------|-----------|-----------------------------|-----------------------|-----------|-----------------------------|-----------------------|-----------|----------------------------|-----------------------|
|                       | Luminex   | 3 <sup>rd</sup> gen RNA-seq | SRNA/next-gen RNA-seq | Luminex   | 3 <sup>rd</sup> gen RNA-seq | SRNA/next-gen RNA-seq | Luminex   | 3 <sup>rd</sup> genRNA-seq | SRNA/next-gen RNA-seq |
| <b>NAAT +ve total</b> | <b>12</b> | <b>3</b>                    | <b>3</b>              | <b>16</b> | <b>16</b>                   | <b>16</b>             | <b>13</b> | -                          | <b>12</b>             |
| ChAdOx1 nCoV-19       | 5         | 2                           | 2                     | 7         | 7                           | 7                     | 5         | -                          | 5                     |
| MenACWY               | 7         | 1                           | 1                     | 9         | 9                           | 9                     | 8         | -                          | 7                     |
| <b>NAAT -ve total</b> | <b>11</b> | <b>7</b>                    | <b>8</b>              | <b>17</b> | <b>13</b>                   | <b>13</b>             | <b>7</b>  | -                          | <b>7</b>              |
| ChAdOx1 nCoV-19       | 4         | 3                           | 3                     | 8         | 5                           | 5                     | 4         | -                          | 3                     |
| MenACWY               | 7         | 4                           | 4                     | 9         | 8                           | 8                     | 3         | -                          | 4                     |
| <b>Total</b>          | <b>23</b> | <b>10</b>                   | <b>10</b>             | <b>33</b> | <b>29</b>                   | <b>29</b>             | <b>20</b> | -                          | <b>19</b>             |

379  
380  
381  
382  
383

Supplementary Table 4 – Sample size (breakdown by NAAT result, vaccine arm and time point). Vaccine type in NAAT-ve arm is irrelevant as neither the placebo or ChAdOx1 nCoV-19 vaccines would be expected to influence gene expression in a non-COVID illness but we have included vaccine type for completeness nevertheless: Stage 2

|                       | D0*       |                       | CT        |                       | CT+7      |                       |
|-----------------------|-----------|-----------------------|-----------|-----------------------|-----------|-----------------------|
|                       | Luminex   | SRNA/next-gen RNA-seq | Luminex   | SRNA/next-gen RNA-seq | Luminex   | SRNA/next-gen RNA-seq |
| <b>NAAT +ve total</b> | <b>49</b> | <b>19</b>             | <b>50</b> | <b>51</b>             | <b>49</b> | <b>52</b>             |
| ChAdOx1 nCoV-19       | 18        | 12                    | 19        | 21                    | 19        | 21                    |
| MenACWY               | 31        | 7                     | 31        | 30                    | 30        | 31                    |

384  
385

\*D0 samples are collected from different participants and are not paired with CT and CT+7 samples for SRNA/mRNA seq. (For cytokine analysis, all time points are paired, except for one missing D0 and one missing CT+7).

386  
387  
388  
389  
390  
391  
392  
393

394  
395  
396  
397  
398  
399  
400  
401  
402

Supplementary Table 5 – Summary demographics characteristics of study participants by study stage, NAAT result and vaccine arm: Stage 1

|                                                     | All participants | ChAdOx1 nCoV-19 |                 | MenACWY         |               | D0 controls*    |
|-----------------------------------------------------|------------------|-----------------|-----------------|-----------------|---------------|-----------------|
|                                                     |                  | NAAT -ve        | NAAT +ve        | NAAT -ve        | NAAT +ve      |                 |
| N enrolled                                          | 34               | 9               | 7               | 9               | 9             | 11              |
| Sex – Male (N, %)                                   | 17 (50%)         | 6 (66.7%)       | 4 (57.1%)       | 3 (33.3%)       | 4 (44.4%)     | 3 (27.3%)       |
| Age – Years (Median, IQR)                           | 35 (28, 45)      | 40.6 (28, 56.3) | 32 (21, 45)     | 40 (32, 45)     | 34 (29, 40)   | 41.9 (21, 56.3) |
| BMI (Median, IQR)                                   | 26 (23.5, 29.1)  | 27 (23.9, 30.3) | 28 (22.4, 29.1) | 25 (23.5, 27.2) | 25 (22.8, 37) | 25 (23.7, 27.6) |
| Interval CT from prime – days (Median, IQR)         | 84 (55, 102)     | 69 (41, 76)     | 89 (71, 103)    | 69 (55, 81)     | 97 (93, 112)  | -               |
| Interval CT from boost – days (Median, IQR)         | 12 (6, 33)       | 8 (6, 37)       | 13 (3, 15)      | 5 (5, 5)        | 33 (14, 34)   | -               |
| Interval CT from symptom onset – days (Median, IQR) | 3 (2, 4)         | 2 (1, 3)        | 2 (2, 3.5)      | 3.5 (1, 7.5, 4) | 4 (3, 6)      | -               |
| CT occurred before boost (N)                        | 18               | 3               | 3               | 8               | 4             | -               |
| Illness severity**                                  |                  |                 |                 |                 |               |                 |
| Mild (N)                                            | 27               | 8               | 5               | 5               | 9             | -               |
| Moderate A (N)                                      | 4                | 1               | 2               | 1               | 0             | -               |

403  
404  
405

\*D0 controls in stage 1 are taken from the subset of participants with NAAT results

\*\*two-sided Chi-squared test comparing mild and moderate case proportions in the NAAT+ ChAdOx1 nCoV-19 and placebo groups yielded a p-value of 0.08.

406  
407

Supplementary Table 6 - Summary demographics characteristics of study participants by study stage, NAAT result and vaccine arm: stage 2

|                                                     | All participants | ChAdOx1 nCoV-19 |  | MenACWY NAAT+ve | D0 controls*  |
|-----------------------------------------------------|------------------|-----------------|--|-----------------|---------------|
|                                                     |                  | NAAT+ve         |  |                 |               |
| N enrolled                                          | 71               | 21              |  | 31              | 19            |
| Sex – Male (N, %)                                   | 19 (26.8%)       | 6 (28.6%)       |  | 6 (19.4%)       | 7 (36.8%)     |
| Age – Years (Median, IQR)                           | 37 (30, 49)      | 39 (32.1, 49)   |  | 37 (28, 46)     | 37 (29, 57.1) |
| BMI (Median, IQR)                                   | 27 (24.3, 33.1)  | 30 (24.3, 32.9) |  | 28 (24.3, 35.5) | 27 (24.5, 31) |
| Interval CT from prime – days (Median, IQR)         | 146 (130, 160)   | 141 (120, 160)  |  | 147 (136, 162)  | -             |
| Interval CT from boost – days (Median, IQR)         | 69 (48, 84)      | 74 (58, 84)     |  | 65 (45, 84)     | -             |
| Interval CT from symptom onset – days (Median, IQR) | 2.5 (2, 4)       | 2 (2, 4)        |  | 3 (2, 4)        | -             |
| CT occurred before boost (N)                        | 0                | 0               |  | 0               | -             |
| Illness severity**                                  |                  |                 |  |                 |               |
| Mild (N)                                            | 40               | 15              |  | 25              | -             |



408 \*D0 controls in stage 2 are independent controls from different participants of the vaccine trial.  
 409 \*\*two-sided Chi-squared test comparing mild and moderate case proportions in the NAAT+ ChAdOx1 nCoV-19 and placebo  
 410 groups yielded a p-value of 0.44.

411  
 412

413 Supplementary Table 7 – Contrasts used to create each volcano figure

| Figure and plot title                       | Stage | Data type       | contrast                                           |
|---------------------------------------------|-------|-----------------|----------------------------------------------------|
| 3 b) NAAT+ve (placebo) Vs NAAT-ve           | 1     | next-gen seq    | CT_NAAT_positive_MenACWY - CT_NAAT_negative        |
| 3 d) NAAT+ve (placebo) Vs NAAT-ve           | 1     | sRNA seq        | CT_NAAT_positive_MenACWY - CT_NAAT_negative        |
| 4 d) D0 vs CT+7 placebo NAAT+ve             | 1     | sRNA-seq        | CT7_NAAT_positive_MenACWY - D0                     |
| 5 a) D0 vs CT placebo NAAT+ve               | 1     | next-gen seq    | CT_NAAT_positive_MenACWY - D0                      |
| 5 c) ChAdOx1 vs placebo NAAT+ve             | 1     | next-gen seq    | CT_NAAT_positive_MenACWY - CT_NAAT_positive_ChAdOx |
| 5 e) D0 vs CT placebo NAAT+ve               | 1     | sRNA-seq        | CT_NAAT_positive_MenACWY - D0                      |
| 5 f) ChAdOx1 vs placebo NAAT+ve             | 1     | sRNA-seq        | CT_NAAT_positive_MenACWY - CT_NAAT_positive_ChAdOx |
| 5 h) ChAdOx1 vs placebo NAAT+ve             | 1     | 3rd gen RNA-seq | CT_NAAT_positive_MenACWY - CT_NAAT_positive_ChAdOx |
| 6 b) Placebo D0 vs CT                       | 2     | next-gen seq    | CT_NAAT_positive_MenACWY - D0                      |
| 6 c) ChAdOx1 nCoV-19 D0 vs CT               | 2     | next-gen seq    | CT_NAAT_positive_ChAdOx - D0                       |
| 6 f) CT ChAdOx1 nCoV-19 vs placebo NAAT+ve  | 2     | next-gen seq    | CT_NAAT_positive_MenACWY - CT_NAAT_positive_ChAdOx |
| 7 a) Placebo D0 vs CT                       | 2     | sRNA-seq        | CT_NAAT_positive_MenACWY - D0                      |
| 7 b) ChAdOx1 nCoV-19 D0 vs CT               | 2     | sRNA-seq        | CT_NAAT_positive_ChAdOx - D0                       |
| S4 a) CT ChAdOx1 nCoV-19 vs placebo NAAT-ve | 1     | next-gen seq    | CT_NAAT_negative_MenACWY - CT_NAAT_negative_ChAdOx |
| S4 b) CT ChAdOx1 nCoV-19 vs placebo NAAT-ve | 1     | 3rd gen RNA-seq | CT_NAAT_negative_MenACWY - CT_NAAT_negative_ChAdOx |
| S4 c) CT ChAdOx1 nCoV-19 vs placebo NAAT-ve | 1     | sRNA-seq        | CT_NAAT_negative_MenACWY - CT_NAAT_negative_ChAdOx |
| S24 a) D0 vs CT+7 placebo NAAT+ve           | 1     | next-gen seq    | CT7_NAAT_positive_MenACWY - D0                     |
| S24 b) D0 vs CT+7 ChAdOx1 nCoV-19 NAAT+ve   | 1     | next-gen seq    | CT7_NAAT_positive_ChAdOx - D0                      |
| S24 c) D0 vs CT+7 NAAT-ve                   | 1     | next-gen seq    | CT7_NAAT_negative - D0                             |

|                                              |   |          |                                  |
|----------------------------------------------|---|----------|----------------------------------|
| S24 d) D0 vs CT+7 ChAdOx1<br>nCoV-19 NAAT+ve | 1 | sRNA-seq | CT7_NAAT_positive_ChAdOx –<br>D0 |
|----------------------------------------------|---|----------|----------------------------------|

414

## 415 Supplementary data

416 Supplementary Data 1 – Complete metadata per participant, information about the samples and time points collected for  
417 each of the omics datasets. Attached as Supplementary\_Data\_1\_full\_metadata\_per\_omics.xlsx

418 Supplementary Data 2 – DGE results, all contrasts, next-gen RNA sequencing, stage 1, attached as  
419 Supplementary\_Data\_2\_RNA\_seq\_DGE\_stage1.xlsx Differential expression analysis was performed using a two-  
420 sided moderate t-test.

421 Supplementary Data 3 – DGE results, all contrasts, next-gen RNA sequencing, stage 2, attached as  
422 Supplementary\_Data\_3\_RNA\_seq\_DGE\_stage2.xlsx Differential expression analysis was performed using a two-  
423 sided moderate t-test.

424 Supplementary Data 4 – DGE results, all contrasts, 3<sup>rd</sup> gen RNA sequencing, stage 1, attached as  
425 Supplementary\_Data\_4\_ONT\_RNA\_seq\_DGE\_stage1.xlsx Differential expression analysis was performed using a  
426 two-sided moderate t-test.

427 Supplementary Data 5 – DGE results, all contrasts, small RNA sequencing, attached as  
428 Supplementary\_Data\_5\_sRNA\_seq\_DGE\_stage1.xlsx Differential expression analysis was performed using a two-  
429 sided moderate t-test.

430 Supplementary Data 6 – DGE results, all contrasts, small RNA sequencing, attached as  
431 Supplementary\_Data\_6\_sRNA\_seq\_DGE\_stage2.xlsx Differential expression analysis was performed using a two-  
432 sided moderate t-test.

433 Supplementary Data 7 – MIEAA2 GO BP results tables, small RNA sequencing, stage 1, attached as  
434 Supplementary\_Data\_7\_MIEAA2\_GO\_BP\_stage1.xlsx Significance testing obtained via MIEAA2 which uses a two-  
435 sided GSEA analysis approach.

436 Supplementary Data 8 – MIEAA2 GO BP results tables, small RNA sequencing, stage 2, attached as  
437 Supplementary\_Data\_8\_MIEAA2\_GO\_BP\_stage2.xlsx Significance testing obtained via MIEAA2 which uses a two-  
438 sided GSEA analysis approach.

439

## 440 Supplementary references

- 441 1 Griffiths-Jones, S., Grocock, R. J., van Dongen, S., Bateman, A. & Enright, A. J. miRBase: microRNA  
442 sequences, targets and gene nomenclature. *Nucleic Acids Res* **34**, D140-144 (2006).  
443 <https://doi.org:10.1093/nar/gkj112>
- 444 2 Yoshihama, M., Nakao, A. & Kenmochi, N. snOPY: a small nucleolar RNA orthological gene database. *BMC*  
445 *Res Notes* **6**, 426 (2013). <https://doi.org:10.1186/1756-0500-6-426>
- 446 3 O'Leary, N. A. *et al.* Reference sequence (RefSeq) database at NCBI: current status, taxonomic expansion,  
447 and functional annotation. *Nucleic Acids Res* **44**, D733-745 (2016). <https://doi.org:10.1093/nar/gkv1189>
- 448 4 Kern, F. *et al.* miEAA 2.0: integrating multi-species microRNA enrichment analysis and workflow  
449 management systems. *Nucleic Acids Res* **48**, W521-W528 (2020). <https://doi.org:10.1093/nar/gkaa309>
- 450 5 Chang, L., Zhou, G., Soufan, O. & Xia, J. miRNet 2.0: network-based visual analytics for miRNA functional  
451 analysis and systems biology. *Nucleic Acids Res* **48**, W244-W251 (2020).  
452 <https://doi.org:10.1093/nar/gkaa467>
- 453 6 Gennady, K. *et al.* Fast gene set enrichment analysis. *bioRxiv*, 060012 (2021).  
454 <https://doi.org:10.1101/060012>
- 455 7 Godard, P. & van Eyll, J. Pathway analysis from lists of microRNAs: common pitfalls and alternative  
456 strategy. *Nucleic Acids Res* **43**, 3490-3497 (2015). <https://doi.org:10.1093/nar/gkv249>
- 457 8 Chen, Y. *et al.* Conformational dynamics of dynamin-like MxA revealed by single-molecule FRET. *Nat*  
458 *Commun* **8**, 15744 (2017). <https://doi.org:10.1038/ncomms15744>
- 459 9 Jumper, J. *et al.* Highly accurate protein structure prediction with AlphaFold. *Nature* **596**, 583-589 (2021).  
460 <https://doi.org:10.1038/s41586-021-03819-2>
